# Supplementary material
Source: PubMed Central journal article supplement (PMC5806119)
Supplement: NIHMS929299-supplement-Supplementary_Appendix.pdf [file NIHMS929299-supplement-Supplementary_Appendix.pdf]

# THE LANCET

## Supplementary appendix

This appendix formed part of the original submission and has been peer reviewed. We post it as supplied by the authors.

Supplement to: Lee JD, Nunes EV Jr, Novo P, et al. Comparative effectiveness of extended-release naltrexone versus buprenorphine-naloxone for opioid relapse prevention (X:BOT): a multicentre, open-label, randomised controlled trial. *Lancet* 2017; published online Nov 14. [http://dx.doi.org/10.1016/S0140-6736\(17\)32812-X](http://dx.doi.org/10.1016/S0140-6736(17)32812-X).

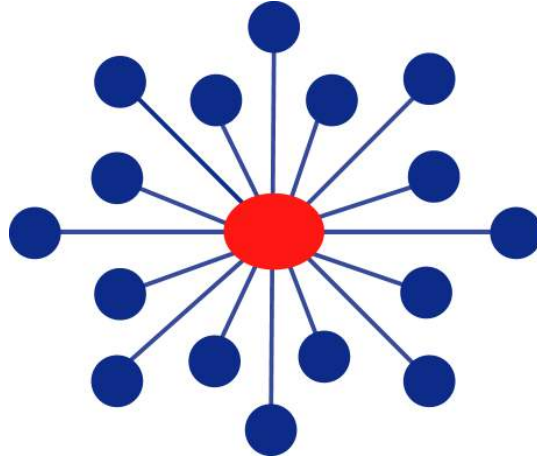

**NIDA CTN Protocol 0051**

# **Extended-Release Naltrexone vs. Buprenorphine for Opioid Treatment (X:BOT)**

**Lead Investigator (LI):** John Rotrosen, MD  
**Co-LI:** Joshua Lee, MD, MSc  
Edward Nunes, MD

**Project Manager:** Patricia Novo, MPH

**Protocol Date: August 31, 2015**

**Version 6.0**

## **PROTOCOL DEVELOPMENT TEAM**

Genie L. Bailey, MD  
Gregory S. Brigham, PhD  
Arthur L. Caplan, PhD  
Allan J. Cohen, MA, MFT  
Marc Fishman, MD  
Michael T. French, PhD  
Mary Jeanne Kreek, MD  
Walter Ling, MD  
Dennis McCarty, PhD  
Larissa J. Mooney, MD  
Susan A. Murphy, PhD  
Dominic Sisti, PhD  
George Woody, MD

### **EMMES:**

Robert Lindblad, MD  
Ro Shauna Rothwell, PhD  
Dee Blumberg, PhD  
Don Stablein, PhD  
Paul Van Veldhuisen, PhD  
Colleen Allen, MPH  
Jeanine May, PhD  
Dagmar Salazar, MS

### **CCTN:**

Petra Jacobs, MD  
David Liu, MD  
Steven Sparenborg, PhD  
Geetha Subramaniam, MD  
Betty Tai, PhD  
Paul G. Wakim, PhD

## TABLE OF CONTENTS

|            |                                                                           |           |
|------------|---------------------------------------------------------------------------|-----------|
| <b>1.0</b> | <b>LIST OF ABBREVIATIONS</b> .....                                        | <b>7</b>  |
| <b>2.0</b> | <b>CTN-0051 SYNOPSIS AND SCHEMA</b> .....                                 | <b>9</b>  |
| <b>3.0</b> | <b>CTN-0051 TIMELINE</b> .....                                            | <b>11</b> |
| <b>4.0</b> | <b>INTRODUCTION</b> .....                                                 | <b>12</b> |
| 4.1        | Background and Rationale.....                                             | 12        |
| 4.2        | Naltrexone (NTX) and Extended-Release Naltrexone (XR-NTX) .....           | 13        |
| 4.3        | Buprenorphine (BUP) and Buprenorphine/Naloxone Combination (BUP-NX) ..... | 14        |
| 4.4        | Significance to the Field.....                                            | 15        |
| <b>5.0</b> | <b>CTN-0051 OBJECTIVES</b> .....                                          | <b>17</b> |
| 5.1        | Primary Objective .....                                                   | 17        |
| 5.2        | Secondary Objectives.....                                                 | 17        |
| <b>6.0</b> | <b>STUDY DESIGN</b> .....                                                 | <b>18</b> |
| 6.1        | Overview of Protocol Study Design.....                                    | 18        |
| 6.2        | Treatment Initiation .....                                                | 19        |
| 6.3        | Duration of Study and Visit Schedule.....                                 | 19        |
| <b>7.0</b> | <b>STUDY POPULATION</b> .....                                             | <b>20</b> |
| 7.1        | Inclusion Criteria .....                                                  | 20        |
| 7.2        | Exclusion Criteria.....                                                   | 20        |
| 7.2.1      | Special Populations to Consider .....                                     | 21        |
| 7.3        | CTP Sites .....                                                           | 21        |
| <b>8.0</b> | <b>STUDY PROCEDURES</b> .....                                             | <b>22</b> |
| 8.1        | Recruitment and Screening (Phase 1) .....                                 | 22        |
| 8.1.1      | Informed Consent (Phase 1) .....                                          | 22        |
| 8.1.2      | Detoxification .....                                                      | 22        |
| 8.1.3      | Screening and Baseline Assessments (Phase 1).....                         | 22        |
| 8.2        | Randomization (Phase 1, Day 0) .....                                      | 23        |
| 8.3        | Stratified Randomization.....                                             | 23        |
| 8.4        | Induction (Phase 2) .....                                                 | 23        |
| 8.5        | Study Treatments (Phase 3).....                                           | 24        |
| 8.5.1      | XR-NTX Group .....                                                        | 25        |
| 8.5.2      | BUP-NX Group .....                                                        | 25        |
| 8.5.3      | Dispensing of XR-NTX and BUP-NX.....                                      | 26        |
| 8.6        | Drug Packaging/Handling/Storage/Accountability .....                      | 27        |
| 8.6.1      | Study Medication Management.....                                          | 27        |
| 8.6.2      | Drug Accountability Records and Dispensing of Study Medication.....       | 27        |
| 8.6.3      | Study Medication Storage .....                                            | 27        |

|             |                                                              |           |
|-------------|--------------------------------------------------------------|-----------|
| 8.6.4       | Used/Unused Medication .....                                 | 27        |
| 8.6.5       | Lost Medication.....                                         | 27        |
| 8.6.6       | Dispensing of Study Medications .....                        | 27        |
| 8.6.7       | Drug Packaging .....                                         | 28        |
| 8.7         | Blinding.....                                                | 28        |
| 8.8         | Participant compensation .....                               | 28        |
| <b>9.0</b>  | <b>OUTCOME MEASURES .....</b>                                | <b>29</b> |
| 9.1         | Primary Outcome.....                                         | 29        |
| 9.2         | Secondary Outcomes .....                                     | 29        |
| <b>10.0</b> | <b>PARTICIPANT DISCONTINUATION, FOLLOW-UP .....</b>          | <b>31</b> |
| 10.1        | Treatment Discontinuation .....                              | 31        |
| 10.2        | Follow-Up (Phase 4).....                                     | 31        |
| <b>11.0</b> | <b>STUDY FORMS, PROCEDURES AND ASSESSMENTS .....</b>         | <b>32</b> |
| 11.1        | General.....                                                 | 34        |
| 11.1.1      | Inclusion/Exclusion .....                                    | 34        |
| 11.1.2      | Locator Form .....                                           | 34        |
| 11.1.3      | Demographics Form .....                                      | 34        |
| 11.1.4      | PhenX Tier 1.....                                            | 34        |
| 11.1.5      | Motivations, Attitudes, and Expectations Form.....           | 34        |
| 11.1.6      | Treatment Satisfaction Survey .....                          | 34        |
| 11.1.7      | Relapse .....                                                | 35        |
| 11.1.8      | Continuing Treatment Forms .....                             | 35        |
| 11.1.9      | Study Termination Form.....                                  | 35        |
| 11.2        | Safety and Medical .....                                     | 35        |
| 11.2.1      | Medical and Psychiatric History .....                        | 35        |
| 11.2.2      | Physical Examination.....                                    | 35        |
| 11.2.3      | DSM-5 Criteria .....                                         | 35        |
| 11.2.4      | Concise Health Risk Tracking-Self Report (CHRT-SR) .....     | 35        |
| 11.2.5      | Clinical Laboratory Tests.....                               | 36        |
| 11.2.6      | Pregnancy and Birth Control Assessment.....                  | 36        |
| 11.2.7      | Adverse Events (AEs) and Serious Adverse Events (SAEs) ..... | 36        |
| 11.2.8      | Injection Site Examination.....                              | 37        |
| 11.3        | Compliance .....                                             | 37        |
| 11.3.1      | Dose Logs.....                                               | 37        |
| 11.3.2      | Medical Management.....                                      | 37        |
| 11.3.3      | Psychosocial Participation .....                             | 37        |
| 11.4        | Drug Use and Psychological.....                              | 38        |
| 11.4.1      | Timeline Follow-Back (TLFB).....                             | 38        |
| 11.4.2      | Urine Drug Screen (UDS) .....                                | 38        |
| 11.4.3      | Addiction Severity Index Lite (ASI-Lite).....                | 38        |

|             |                                                                    |           |
|-------------|--------------------------------------------------------------------|-----------|
| 11.4.4      | Visual Analog Scales (VAS).....                                    | 38        |
| 11.4.5      | The Hamilton Depression Scale (17 item) (HAM-D).....               | 38        |
| 11.4.6      | The Subjective Opioid Withdrawal Scale (SOWS).....                 | 39        |
| 11.4.7      | Fagerström Test for Nicotine Dependence (FTND).....                | 39        |
| 11.4.8      | Risk Assessment Battery (RAB).....                                 | 39        |
| 11.4.9      | Cognitive Function Tests.....                                      | 39        |
| 11.4.10     | Detoxification Utilization Form.....                               | 39        |
| 11.4.11     | EuroQoL (EQ-5D).....                                               | 39        |
| 11.4.12     | Non-Study Medical and Other Services (NMS).....                    | 39        |
| 11.5        | Genetics Protocol Measures.....                                    | 40        |
| <b>12.0</b> | <b>STATISTICAL ANALYSIS.....</b>                                   | <b>41</b> |
| 12.1        | General Design.....                                                | 41        |
| 12.1.1      | Primary and Secondary Outcomes (Endpoints).....                    | 41        |
| 12.1.2      | Design.....                                                        | 41        |
| 12.2        | Rationale for Sample Size and Statistical Power.....               | 41        |
| 12.2.1      | Projected Number of Sites, and Participants per Site.....          | 43        |
| 12.3        | Study modification for differential treatment initiation.....      | 43        |
| 12.4        | Statistical Methods for Primary and Secondary Outcomes.....        | 44        |
| 12.5        | Significance Testing.....                                          | 45        |
| 12.6        | Exploratory Analyses.....                                          | 45        |
| 12.7        | Interim Analyses.....                                              | 45        |
| 12.8        | Missing Data and Dropouts.....                                     | 46        |
| 12.9        | Demographic and Baseline Characteristics.....                      | 46        |
| 12.10       | Safety Analysis.....                                               | 47        |
| <b>13.0</b> | <b>REGULATORY COMPLIANCE AND SAFETY MONITORING.....</b>            | <b>48</b> |
| 13.1        | Statement of Compliance.....                                       | 48        |
| 13.2        | Institutional Review Board Approvals.....                          | 48        |
| 13.3        | Research Advisory Panel of California (California sites only)..... | 48        |
| 13.4        | Confidentiality.....                                               | 48        |
| 13.4.1      | Health Insurance Portability Accountability Act (HIPAA).....       | 49        |
| 13.4.2      | Investigator Assurances.....                                       | 49        |
| 13.4.3      | Financial Disclosure.....                                          | 49        |
| 13.5        | Drug Accountability.....                                           | 49        |
| 13.5.1      | DEA Registration.....                                              | 49        |
| 13.5.2      | Inclusion of Women and Minorities.....                             | 49        |
| 13.5.3      | IND Requirements.....                                              | 50        |
| 13.5.4      | Regulatory Files.....                                              | 50        |
| 13.5.5      | Records Retention and Requirements.....                            | 50        |
| 13.5.6      | Audits.....                                                        | 50        |

|             |                                                                       |           |
|-------------|-----------------------------------------------------------------------|-----------|
| 13.5.7      | Reporting to Sponsor .....                                            | 50        |
| 13.5.8      | Informed Consent .....                                                | 50        |
| 13.5.9      | Clinical Monitoring.....                                              | 51        |
| 13.5.10     | Study Documentation.....                                              | 51        |
| 13.6        | Safety Monitoring.....                                                | 52        |
| 13.6.1      | Medical Monitor .....                                                 | 52        |
| 13.6.2      | Data and Safety Monitoring Board (DSMB).....                          | 52        |
| 13.6.3      | Protocol Deviations Reporting and Management .....                    | 52        |
| 13.6.4      | Adverse Events (AEs).....                                             | 53        |
| 13.6.5      | Serious Adverse Events.....                                           | 54        |
| 13.6.6      | Known Potential Toxicities of Study Drug/Intervention .....           | 54        |
| <b>14.0</b> | <b>DATA MANAGEMENT AND PROCEDURES .....</b>                           | <b>55</b> |
| 14.1        | Design and Development .....                                          | 55        |
| 14.2        | Site Responsibilities.....                                            | 55        |
| 14.3        | Data Center Responsibilities.....                                     | 55        |
| 14.4        | Data Collection .....                                                 | 55        |
| 14.5        | Data Acquisition and Entry.....                                       | 55        |
| 14.6        | Data Editing.....                                                     | 55        |
| 14.7        | Data Lock and Transfer .....                                          | 56        |
| 14.8        | Data Training.....                                                    | 56        |
| 14.9        | Data QA.....                                                          | 56        |
| <b>15.0</b> | <b>PUBLICATIONS AND OTHER RIGHTS .....</b>                            | <b>57</b> |
| <b>16.0</b> | <b>SIGNATURES .....</b>                                               | <b>58</b> |
| <b>17.0</b> | <b>REFERENCES .....</b>                                               | <b>59</b> |
| <b>18.0</b> | <b>APPENDICES .....</b>                                               | <b>64</b> |
|             | APPENDIX A – Adverse Event Reporting Definitions and Procedures ..... | 65        |
|             | APPENDIX B – Data Safety and Monitoring Plan .....                    | 70        |
|             | APPENDIX C – XR-NTX .....                                             | 74        |
|             | APPENDIX D – BUP-NX .....                                             | 106       |

## 1.0 LIST OF ABBREVIATIONS

| <b>Abbreviation</b> | <b>Definition</b>                                                   |
|---------------------|---------------------------------------------------------------------|
| AE                  | Adverse Event                                                       |
| ALT                 | Alanine Aminotransferase                                            |
| ASI-Lite            | Addiction Severity-Index-Lite                                       |
| AST                 | Aspartate Aminotransferase                                          |
| BMI                 | Body Mass Index                                                     |
| BP                  | Blood Pressure                                                      |
| BUP                 | Buprenorphine                                                       |
| BUP-NX              | Buprenorphine+Naloxone (Suboxone®)                                  |
| CAP                 | College of American Pathologists                                    |
| CCC                 | Clinical Coordinating Center                                        |
| CFR                 | Code of Federal Regulations                                         |
| CHRT                | Concise Health Risk Tracking                                        |
| CLIA                | Clinical Laboratory Improvement Amendment of 1988                   |
| CNS                 | Central Nervous System                                              |
| CoC                 | Certificate of Confidentiality                                      |
| CRF                 | Case Report Form                                                    |
| CTN                 | Clinical Trials Network                                             |
| CTP                 | Community Treatment Program                                         |
| DEA                 | Drug Enforcement Agency                                             |
| DHHS                | Department of Health and Human Services                             |
| DSC                 | Data and Statistics Center                                          |
| DSM-5               | Diagnostic and Statistical Manual of Mental Disorders Fifth Edition |
| DSMB                | Data and Safety Monitoring Board                                    |
| eCRF                | Electronic Case Report Form                                         |
| EDC                 | Electronic Data Capture                                             |
| ERC                 | Ethics Review Committee                                             |
| FDA                 | Food and Drug Administration                                        |
| FTND                | Fagerström Test for Nicotine Dependence                             |
| FWA                 | Federal Wide Assurance                                              |
| GCP                 | Good Clinical Practice                                              |
| HAM-D               | Hamilton Depression Scale                                           |
| HBsAB               | Hepatitis B surface antibody                                        |
| HBsAG               | Hepatitis B surface antigen                                         |
| HCV                 | Hepatitis C Virus                                                   |
| HIPAA               | Health Insurance Portability and Accountability Act                 |
| HIV                 | Human Immunodeficiency Virus                                        |
| HR                  | Heart Rate                                                          |
| IND                 | Investigational New Drug                                            |
| IRB                 | Institutional Review Board                                          |
| IM                  | Intramuscular                                                       |
| IV                  | Intravenous                                                         |
| LFTs                | Liver Function Tests (AST, ALT, albumin and bilirubin)              |
| LI                  | Lead Investigator                                                   |
| MD                  | Medical Doctor                                                      |
| MDMA                | Methylenedioxymethamphetamine (Ecstasy)                             |
| MedDRA              | The Medical Dictionary for Regulatory Activities                    |
| Mg                  | Milligrams                                                          |



|        |                                                    |
|--------|----------------------------------------------------|
| MM     | Medical Management                                 |
| MOP    | Manual of Operations                               |
| NDA    | New Drug Application                               |
| NIAAA  | National Institute on Alcohol Abuse and Alcoholism |
| NIDA   | National Institute on Drug Abuse                   |
| NIH    | National Institutes of Health                      |
| NMS    | Non-Study Medical and Other Services               |
| NP     | Nurse Practitioner                                 |
| NTX    | Naltrexone                                         |
| NX     | Naloxone                                           |
| OHRP   | Office for Human Research Protections              |
| PA     | Physician Assistant                                |
| PI     | Principal Investigator                             |
| PLG    | Poly lactide-co-glycolide                          |
| QA     | Quality Assurance                                  |
| RAB    | Risk Assessment Battery                            |
| RAP-C  | Research Advisory Panel of California              |
| RRTC   | Regional Research and Training Center              |
| SAE    | Serious Adverse Event                              |
| SC     | Subcutaneous                                       |
| SOWS   | Subjective Opiate Withdrawal Scale                 |
| TAU    | Treatment as Usual                                 |
| TLFB   | Timeline Follow-Back                               |
| UDS    | Urine Drug Screen                                  |
| VA     | Veterans Administration                            |
| VAS    | Visual Analog Scale                                |
| XR-NTX | Extended-Release Naltrexone (Vivitrol®)            |

## 2.0 CTN-0051 SYNOPSIS AND SCHEMA

For opioid-dependent patients in the U.S. and most of the rest of the world, detoxification or detoxification followed by short term residential treatment, with the goal of achieving long-term abstinence from opioid misuse is a mainstay of treatment. Nonetheless, the majority of patients treated in this way will relapse to opioid misuse, leading to a costly and ineffectual cycle of readmission for repeated detoxifications.

The overarching goal of CTN-0051 is to foster adoption of new relapse-prevention pharmacotherapies in community-based treatment programs (CTPs) where these could have a substantial public health impact. To this end CTN-0051 will assess the comparative effectiveness of extended release injectable naltrexone (XR-NTX, Vivitrol®), an opioid antagonist recently approved and indicated for the prevention of relapse to opioid dependence, versus buprenorphine-naloxone (BUP-NX, Suboxone®), a high affinity partial agonist indicated for maintenance treatment of opioid dependence, as pharmacotherapeutic aids to recovery.

The study is conducted in 8 CTN-affiliated CTPs that provide or partner with detoxification services (inpatient/residential) which have the capacity to maintain participants opioid-free for approximately 3-7 days, have the capacity to provide medication-assisted therapy, and can provide a minimum of one group or individual counseling session per week during the 24-week treatment period. Up to 600 eligible participants will be randomized to treatment with XR-NTX or BUP-NX for 24 weeks (sufficient to include 350 participants who are randomized more than 72 hours after their last opioid). To maximize generalizability, the point of randomization is flexible, from shortly after program admission until just prior to program discharge. A data analysis modification (assessment of whether the early vs. late randomizers have a differential treatment effect and if so, time to relapse will be estimated for early and late randomizers separately) will occur if differential treatment initiation is a problem for cases randomized prior to completing detoxification (i.e., significantly fewer early randomizers are able to complete detoxification and XR-NTX induction).

The primary goal of the study is to estimate the difference, if one exists, between XR-NTX and BUP-NX in the distribution of the time to relapse (i.e., loss of persistent abstinence) during the 6-month trial. The primary outcome measure is the time to the event, with the event called relapse. Secondary objectives are to: (1) compare outcome on XR-NTX versus BUP-NX across a range of clinical safety and secondary efficacy domains, (2) explore demographic, clinical, and genetic predictors of successful treatment and moderators of differential effectiveness (i.e., what variables may help clinicians choose which of these treatments is best for a given patient), and (3) collect a limited dataset to permit analyses of economic costs and benefits of the two treatments.

Toward the end of the 24-week treatment period, participants are referred for follow-up care in the community (which could include pharmacotherapy if desired and available), and follow-up outcomes are assessed at week 28 and week 36 after randomization. For participants receiving BUP-NX, who do not wish to continue, or for whom community resources are not available, the study provides a two-week BUP-NX taper.

**Figure 1: CTN-0051 Schema**

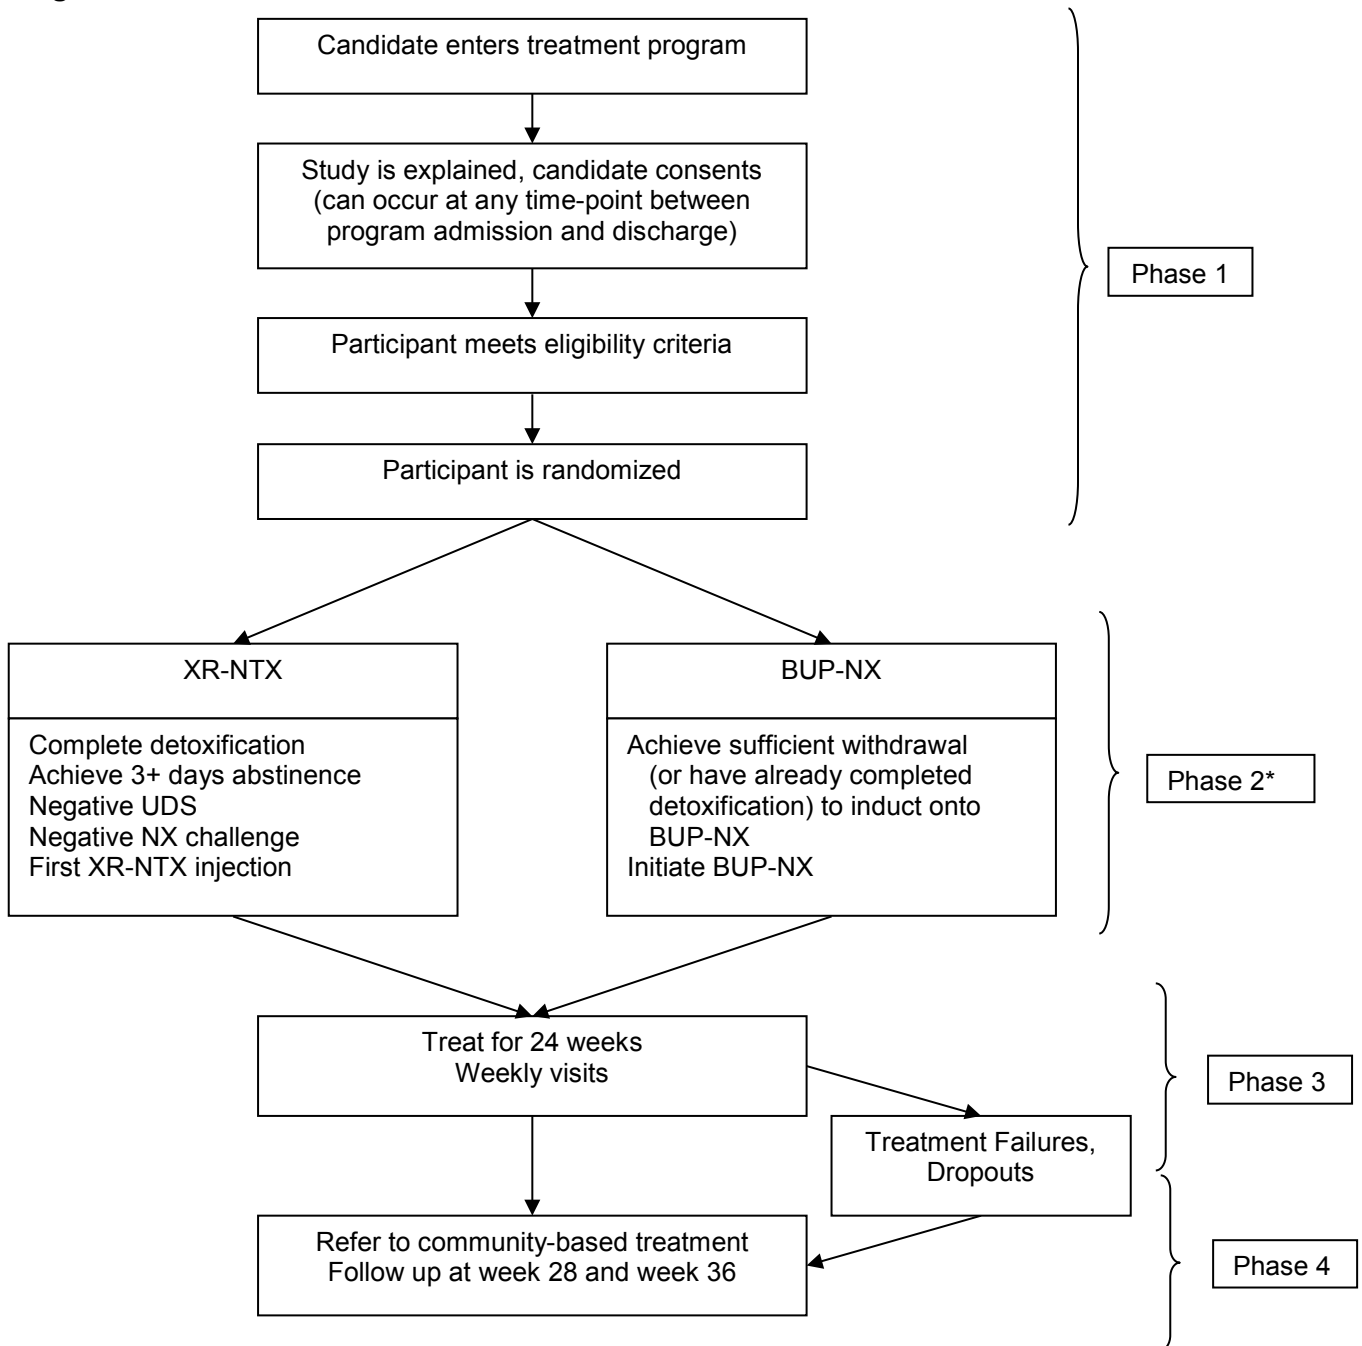

\*The window for induction remains open into Phase 3 (until week 22).

### **3.0 CTN-0051 TIMELINE**

Study activities are expected to last up to 38 months at participating sites. A phased startup, with two or three sites starting several months before the others, is anticipated. The timeline is as follows:

- Study start up (IRB approvals, hiring, training): up to 3 months
- Enrollment: up to 24 months
- Treatment: 6 months
- Follow-up: 3 months
- Data lock: 2 months

## 4.0 INTRODUCTION

### 4.1 Background and Rationale

Opioid dependence is a chronic relapsing disorder, conveying serious risks including disability, incarceration, transmission of blood-borne infections, and death from opioid overdose. There is now nearly a half century of overwhelming evidence that agonist substitution, initially with methadone and more recently with buprenorphine, is both efficacious in clinical trials and effective in the community in promoting and sustaining abstinence and reducing risks associated with opioid dependence.<sup>1,2</sup> Despite this, “drug-free” non-medication-based strategies, such as short-term detoxification followed by psychosocial counseling, while associated with high relapse rates, remain a mainstay of treatment in U.S. community-based settings.<sup>3,4</sup> Reasons include negative societal, institutional and personal attitudes toward agonists, individual preference to be “drug-free”, and limited access to medication and providers. Naltrexone (NTX), a full mu-opioid antagonist, has been FDA-approved for opioid pharmacotherapy since the 1980s, but in its orally administered form it is largely ineffective, it has virtually no place as first-line opioid treatment, and it is little used in the community.<sup>5-6</sup> Two recent studies of XR-NTX (Comer et al.<sup>7</sup>, testing Depotrex<sup>®</sup>, Biotech Inc., in New York City and Philadelphia; and Krupitsky et al.<sup>8</sup>, testing Vivitrol<sup>®</sup>, Alkermes Inc., in Russia) support efficacy of XR-NTX compared to placebo injections.

In October 2010, largely on the basis of the Russian trial and an earlier U.S. safety study (Alkermes ALK21-006 and ALK21-006-EXT), the FDA approved Vivitrol<sup>®</sup> for the “prevention of relapse to opioid dependence”. Patients and treatment programs now have a remarkable opportunity to choose between two pharmacologically distinct and opposite treatment approaches, XR-NTX and BUP-NX, each with established efficacy. Yet, little is known about XR-NTX implementation in U.S. community-based settings, and the FDA’s decision has been criticized insofar as (1) the FDA “accepted a single trial of injectable naltrexone in Russia, unpublished at the time, as primary evidence of efficacy”, and (2) “the study did not adequately assess risk of post-treatment overdose”.<sup>9,10</sup> Since agonist therapy is prohibited in Russia, these authors question the use of these “data to gain approval in the USA – where methadone and buprenorphine are widely available”.

Regardless of the merit of these concerns, the data from the Russian placebo-controlled efficacy trial do not directly address the effectiveness, comparative effectiveness, safety, and costs of XR-NTX in U.S. community-based populations and treatment programs. There are few, if any, data to guide choice and to direct patient-centered treatment decisions. It is in this context that our primary goals are to learn and inform the field about XR-NTX implementation in the community and to compare that to BUP-NX – specifically with regard to population and treatment program characteristics associated with successful outcomes – to foster more widespread adoption of new pharmacotherapies and prevent relapse. Our aims are to clearly address key questions emerging from the availability of mechanistically opposite treatment options and to develop pilot data to inform future studies. Overall, are the two approaches (XR-NTX vs. BUP-NX) essentially equally effective? Are there demographic, and/or clinical factors associated with favorable treatment outcome overall, or that predict better outcome with one approach vs. the other? What treatment-program characteristics are associated with success with each of the treatments?

A key design consideration to highlight early in this introduction is that induction from active opioid use onto XR-NTX and BUP-NX differs substantially. Ideally (though not necessarily typically) BUP-NX induction is initiated in the very early phase of opioid withdrawal and BUP-NX maintenance is pursued instead of opioid detoxification. In contrast, because naltrexone is a full

mu antagonist that will precipitate withdrawal, induction is deferred until full detoxification has been completed and a patient has been fully opioid-free for several days. In this study, participants may be inducted onto BUP-NX at various points during a detoxification admission and during or after a detoxification taper, while all XR-NTX-randomized participants will need to complete detoxification. To maximize recruitment and generalizability, randomization may occur at any time up to 15 days following consent, affording the CTP and the patient maximum flexibility as to the timing of decision-making during the detoxification process or soon after. While BUP-NX induction often occurs as part of office-based prescribing to active opioid users and does not involve a detoxification start point, BUP-NX induction during or following detoxification *is* common practice in detoxification units and during post-detoxification aftercare, particularly as patients entering a treatment facility are often in crisis, not yet aware of the full menu of treatment options, and often don't recognize or accept that they are unlikely to succeed in aftercare without medication. Further, for many patients, information about access to – and third-party payment for – BUP-NX maintenance is often not available until late in the course of a detoxification admission, if it is available at all. For these reasons, it is not uncommon to initiate BUP-NX treatment during or following detoxification, and there are CTN CTPs that have standard operating procedures for this. Further, in discussions with clinical sites for this trial, it has become clear that in many parts of the U.S., medication treatment is not available for most opioid-dependent patients, due to a combination of lack of services or practitioners and lack of third-party coverage. Hence, there is a large population of opioid-dependent patients who enter detoxification programs to which the findings of the proposed trial should generalize. To maximize generalizability, the point of randomization is flexible, from shortly after program admission until just prior to program discharge. A data analysis modification (assessment of whether the early vs. late randomizers have a differential treatment effect and if so, time to relapse will be estimated for early and late randomizers separately) will occur if differential treatment initiation is a problem for cases randomized prior to completing detoxification (i.e., significantly fewer early randomizers are able to complete detoxification and XR-NTX induction).

#### **4.2 Naltrexone (NTX) and Extended-Release Naltrexone (XR-NTX)**

NTX is a potent opioid antagonist with high affinity for the mu-opioid receptor. In the U.S. it is approved for use in treating opioid dependence and alcohol dependence. It is highly efficacious in preventing relapse to opioid dependence provided that it is taken as prescribed, but adherence with oral naltrexone is problematic and leads to extremely high dropout rates, with the occasional exception of treatment in criminal justice and other settings where relapse may be linked to severe adverse consequences.<sup>11-13</sup> This has led to intensive efforts – including NIDA- and NIAAA-funded grants to small businesses – to develop long-acting naltrexone preparations that can be administered as an injection or placed as an implant once per month or less frequently.<sup>14,15</sup>

XR-NTX (Vivitrol<sup>®</sup>, NTX-containing polylactide-co-glycolide [PLG] biodegradable sterile microspheres suspended in a diluent) is delivered by monthly injection into the muscles of the upper outer quadrant of the buttock. Each vial of microspheres contains 380 mg NTX which are suspended by adding a diluent that comes with the product and shaking for about a minute prior to injection of the “full” (less dead-space) content of the vial. Plasma concentrations of NTX and 6-beta naltrexol (its main active metabolite) after a single XR-NTX injection are detectable for at least 30 days. Consistent with this, in human laboratory studies with Vivitrol<sup>®</sup> and Depotrex<sup>®</sup>, essentially complete blockade of opioid agonist effects is seen for 30 days.<sup>16-17</sup> To maintain blockade beyond 30 days, XR-NTX must be re-administered. Long-term use of NTX and XR-NTX is not associated with tolerance, dependence, addiction or withdrawal on discontinuation. NTX and XR-NTX will, however, precipitate withdrawal in individuals physiologically dependent on opioids.

As a consequence of its extended duration of action and “assured” treatment adherence, XR-NTX may dramatically and favorably alter the limited effectiveness profile associated with orally administered NTX. By ensuring 30-day medication adherence with a single injection, and thereby establishing a ~30 day mu-opioid antagonist blockade, the likelihood of an individual re-establishing opioid dependence during this period is very low. The two clinical trials cited above (Comer et al.<sup>7</sup>, and Krupitsky et al.<sup>8</sup>) support efficacy for XR-NTX preparations compared to placebo injections.

The 2006 Comer et al. study<sup>7</sup> was a proof-of-concept, 2-month randomized, placebo-controlled trial with a subcutaneously administered product (Depotrex<sup>®</sup>, Biotek Inc.), and showed that long-acting injectable naltrexone in conjunction with outpatient counseling produced superior treatment retention to placebo, providing “evidence of the feasibility, efficacy, and tolerability of long-lasting antagonist treatments for opioid dependence”.

The Krupitsky et al. study<sup>8</sup> was conducted in 2008 and 2009 in 13 sites in Russia, and was sponsored by the manufacturer, Alkermes Inc. Following inpatient detoxification, 250 opioid-dependent patients were randomized to XR-NTX (Vivitrol<sup>®</sup>) or placebo, double-blind monthly injections, for 6-months, during which all patients received outpatient counseling. The percent of opioid abstinent weeks, by weekly urine toxicology, was the primary outcome. A response profile analysis compared the cumulative percent of patients at each level of the outcome (percent opioid-free weeks) between the active XR-NTX and placebo conditions. The difference between the response profiles was significant ( $p < .0002$ ), with the median patient on XR-NTX having 90% abstinent weeks compared to 35% abstinent weeks for the median patient on placebo. Total abstinence (100% opioid-free weeks) was reported in 45 (35.7%) subjects in the XR-NTX group versus 28 (22.6%) subjects in placebo group ( $p < .03$ ). Retention in treatment for the full 6 months was 53% on XR-NTX, compared to 38% on placebo ( $p < .02$ ). The 6-month retention rate in the 50% range is similar to that observed in clinical trials of buprenorphine.<sup>2</sup> Patients treated with XR-NTX showed an approximately 50% sustained reduction in craving compared to no change in craving in the placebo group ( $p < .005$ ). XR-NTX was generally well tolerated. Data from this pivotal trial supported Alkermes’ supplemental NDA for treatment of opioid dependence.

**Prescribing and Safety:** Details on XR-NTX (Vivitrol<sup>®</sup>) prescribing, pharmacokinetics and pharmacodynamics, metabolism and elimination, safety and toxicity are in Appendix C.

### 4.3 Buprenorphine (BUP) and Buprenorphine/Naloxone Combination (BUP-NX)

Buprenorphine (BUP) is a lipophilic thebaine derivative with a high binding affinity at the mu-opioid receptor where it has partial agonist effects, and at the kappa opioid receptor where it is a competitive antagonist. Like many opioids it was initially commercially developed as an analgesic. In October 2002, the FDA approved BUP for detoxification and maintenance treatment of opioid dependence. For these indications BUP is marketed as Subutex<sup>®</sup> (Reckitt Benckiser), and in a 4:1 ratio combination with naloxone (BUP-NX), as Suboxone<sup>®</sup> (Reckitt Benckiser). The BUP-NX combination was developed to limit abuse liability and diversion.<sup>18-22</sup> Generic formulations of BUP-NX are now available. Recently Reckitt Benckiser began marketing a sublingual BUP-NX film and this is the formulation that is used in the present study. Numerous clinical trials, many of them conducted through a NIDA/VA Cooperative Studies Program partnership and others by the NIDA Clinical Trials Network, involving thousands of participants, have overwhelmingly established both efficacy and effectiveness of BUP-NX in the community.<sup>21,23-32</sup> BUP and BUP-NX are safe and effective alternatives to methadone<sup>27,28,30,33-36</sup>, and enable significant and substantial improvement over time in psychosocial functioning.<sup>37</sup>

Maximal drug effects typically occur at approximately 8 to 16 mg, although sublingual daily doses up to 32 mg have been safely administered for a period of up to a year.<sup>27,34,38</sup> Variability in individual dosing addresses the range and severity of opioid dependence across patients. Because of BUP's lipophilicity and high affinity to the mu-opioid receptor, less-frequent-than-daily dosing is possible for some patients.<sup>39</sup> BUP's slow dissociation from mu-opioid receptors contributes to its long duration of action and smooth day-to-day course, and minimizes symptoms and signs of withdrawal upon cessation.<sup>40,41</sup>

Owing to its partial agonist properties, BUP has limited respiratory depressant effects, low toxicity even at high doses, and limited risk with overdose.<sup>42,43</sup> At sufficient doses, BUP blocks the effects of exogenous opioids<sup>44,45</sup> and can both reduce illicit use and afford some level of protection against overdose. BUP has abuse potential, though in contrast to full agonists like methadone, this is limited, likely also a consequence of partial agonist properties.<sup>38, 45-51,38,44</sup> Although there is a ceiling on BUP's respiratory depressant effects<sup>38</sup>, interactions with other CNS depressants such as benzodiazepines and alcohol are potentially dangerous<sup>52,53</sup> and patients should be cautioned to avoid acute binge use of CNS depressants.<sup>54</sup> Because BUP is metabolized by cytochrome P-450 3A4<sup>55</sup>, drugs that inhibit or induce this system can affect BUP levels. Known inhibitors include erythromycin, ketoconazole, grapefruit juice and certain HIV protease inhibitors<sup>56</sup> which may increase BUP levels. Inducers include phenobarbital, carbamazepine, and phenytoin which could reduce BUP levels and lead to withdrawal symptoms<sup>54</sup> though this has not been observed clinically.

Unlike methadone, BUP-NX is typically prescribed in office-based treatment settings which makes it an ideal comparator for XR-NTX, particularly at a time when there is a movement to expand treatment from traditional addictions specialty programs to mainstream healthcare settings. Office-based BUP-NX permits patients to receive medication by prescription to be taken at home for days, weeks or even months, thereby avoiding the requirement for frequent (often daily) attendance at methadone maintenance programs and its associated stigma. Patients can return to a more "normal" life in a relatively short time span. BUP-NX treatment may either be long or short term, however much of the available evidence (much of it from CTN studies<sup>32,57-59</sup>) suggests a high rate of relapse on discontinuation even after several months of treatment. Many participants in CTN studies have expressed the strong desire to use BUP-NX as a maintenance medication rather than a short-term treatment or a detoxification agent.<sup>32, 59</sup> Of note, an expanding number of addictions specialty programs as well as medical primary care settings, HIV clinics and other mainstream programs, have implemented sustainable outpatient addictions pharmacotherapy initiatives with BUP-NX.

**Prescribing and Safety:** Details on BUP-NX (Suboxone<sup>®</sup>) prescribing, pharmacokinetics and pharmacodynamics, metabolism and elimination, safety and toxicity are in Appendix D.

#### 4.4 Significance to the Field

Advantages of XR-NTX include that it affords a 30-day duration of action, confirmed administration with no uncertainty about compliance, and virtually no abuse potential or diversion risk. Disadvantages are that XR-NTX is expensive, that it requires monthly injection, and that currently very little is known about its implementation, effectiveness, comparative effectiveness, safety and costs in U.S. community-based treatment settings. In contrast, much more is known about BUP-NX, the advantages of which include being widely embraced by patients and by the treatment community. Disadvantages are that there remain barriers to more widespread BUP-NX use including high cost, lack of third-party coverage, shortages of trained providers, concerns about abuse and diversion, and, not least, not all patients respond favorably. Clinical trials suggest that approximately 50% of patients started on buprenorphine will be retained in treatment after six months, a good result for a chronic relapsing disorder such



as opioid dependence; but the flip side of this is that 50% will have dropped out. Further, despite decades of success, “negative” views about agonist-based maintenance therapy persist amongst many individuals and institutions in the broader community and amongst many patients and providers who prefer a “drug-free” approach (i.e., free of narcotic or addictive drugs such as methadone, BUP or BUP-NX; in this context “drug-free” does not equate to “medication-free”, for example non-addictive medication such as XR-NTX). For institutions and individuals preferring “drug-free” treatment, XR-NTX may be a potent tool in facilitating “medication-assisted recovery”.

CTN-0051 has the potential to: (1) address critical clinical questions, (2) foster adoption of new pharmacotherapies via community-based specialty and mainstream treatment settings, and (3) advance public health (opioid misuse, associated infections, associated criminal justice consequences, direct and indirect costs of addiction, etc.) by improving and expanding effective treatment.

## 5.0 CTN-0051 OBJECTIVES

### 5.1 Primary Objective

The primary goal of the study is to estimate the difference, if one exists, between XR-NTX and BUP-NX in the distribution of the time to relapse (i.e., loss of persistent abstinence) during the 6-month trial.

The primary outcome measure is the time to the event, with the event called relapse. By definition individuals are abstinent at the time of randomization. Relapse occurs if the participant is using any non-protocol prescribed opioids regularly starting at day 21 post-randomization or thereafter. Operationally, relapse is defined as either: (a) four consecutive opioid use weeks, or (b) seven consecutive days of use by self-report. A use week is defined as any week during which a participant self-reports at least one day of use during that week, provides a urine sample positive for non-protocol opioids, or fails to provide a urine sample. Self-report of opioid (heroin or prescription opioids) and other substance use is ascertained at each weekly study visit using the Timeline Follow-Back for each day leading back to the previous visit. Urine is collected at each study visit and tested for opioids. In the event that a participant reports no use, but their urine test indicates use, the week is considered a use week. Missing urine samples are classified as positive. The time of the event occurs at the start of the qualifying clinical event period (e.g., first of the 7 consecutive use days or start of the 4 consecutive weeks of use).

### 5.2 Secondary Objectives

Secondary objectives are to:

1. Compare outcome on XR-NTX versus BUP-NX for the following domains:
  - a. Proportion successfully inducted onto assigned medication.
  - b. Safety, as measured by adverse events and serious adverse events, including opioid overdose episodes, both during the 6-month trial and during the 3-month follow-up period.
  - c. Opioid abstinence, as measured by the Timeline Follow-Back (TLFB) (self-report days using opioids), proportion of opioid-positive urine tests.
  - d. Misuse of alcohol and other drugs of abuse (e.g., cocaine, other stimulants, cannabis, benzodiazepines), by self-report and urine drug screens.
  - e. Tobacco use, as measured by the Fagerström Test for Nicotine Dependence (FTND).
  - f. Craving for opioids, and for other drugs, measured by Visual Analog Scales (VAS).
  - g. Depressive, anxiety, and subacute withdrawal symptoms (typical constellation is fatigue, anorexia, and insomnia), as measured by the Hamilton Depression Scale (17-item) (HAM-D) and the Subjective Opioid Withdrawal Scale (SOWS).
  - h. Problems related to drug abuse, as measured by the Addiction Severity-Index-Lite (ASI-Lite) and EuroQol (EQ-5D).
  - i. HIV risk behavior over time, as measured by the Risk Assessment Battery (RAB).
  - j. Cognitive function, as measured by performance on brief pen and paper tasks (Trail Making Test Parts A and B, Stroop).
2. Explore baseline demographic, clinical, and genetic features as predictors of opioid use outcome over the 6-month trial (main effect of predictors), and as moderators of differential treatment effect (moderator by treatment interaction).
3. Collect a limited dataset to permit analyses of economic costs and benefits of the two treatments.

## 6.0 STUDY DESIGN

### 6.1 Overview of Protocol Study Design

This is a multi-center, two-arm, 6-month (24-week), parallel-group, open-label, randomized controlled trial to examine the comparative effectiveness and safety of XR-NTX versus BUP-NX. Candidates are individuals seeking treatment for opioid dependence (heroin or prescription opioids) who are admitted to an inpatient (detoxification and/or short term residential treatment) program for treatment of substance dependence. The study is conducted in 8 CTPs that: (a) provide or partner with opioid detoxification services (inpatient/residential) which have the capacity to maintain participants opioid-free, (b) have the capacity to initiate patients onto XR-NTX or BUP-NX, (c) have the capacity to maintain participants on XR-NTX or BUP-NX for the duration of the 24-week trial, (d) have a sufficient flow of patients completing detoxification and who do not routinely receive long-term medication-assisted therapy as to provide a sufficient population of potential participants to achieve study enrollment goals, and (e) can provide a minimum level of outpatient care (at least one group and/or individual counseling session per week) for 24 weeks. Candidates are consented, screened, and randomized at the time of admission, during detoxification or during early abstinence. Participants meeting all eligibility criteria are randomized to one of two treatment conditions, XR-NTX or BUP-NX. Treatment is for 24 weeks in the context of a protocol-directed medical management treatment program and individual or group psychosocial counseling. Research visits occur weekly, until relapse criteria are met, for collection of urine samples and safety and other assessments. XR-NTX is administered by injection on an approximately every-four-week basis; BUP-NX is provided for take-home, initially on a weekly basis, transitioning to an every-two-week and then to an every-four-week schedule. Medical management for both conditions is on a similar (weekly, transitioning to every-two-weeks, to every-four-weeks) schedule. The primary outcome measure is the time to the event of relapse. XR-NTX is provided as Vivitrol®. BUP-NX is provided as Suboxone® film.

The Protocol will proceed in four phases (see Figure 1).

Phase 1: Informed Consent, Screening, and Randomization (Days -15 through Day 0): This phase begins with informed consent during the index admission, and initiates enrollment, the conduct of all study-specific procedures and the collection of study data. During the first several days of an index admission, clinical and/or research staff provide information about the study to potential participants (for scheduled admissions this information may be provided in advance of the admission). Guidelines for opioid detoxification are provided in the study MOP; data on detoxification utilization are collected. This phase may take place from 1 day up to 15 days. Following final review and confirmation of all eligibility criteria, randomization may proceed. Randomization may take place on the same day as informed consent and screening if recent liver function results are available, but in most cases takes place 2 or 3 days later. Regardless of when randomization takes place, the date of randomization is defined as “Day 0”.

Phase 2: Induction (Day 0 through Day 156): Following randomization, participants are inducted onto their assigned active medication condition and treated as outpatients for 24 weeks per protocol. Guidelines for induction onto XR-NTX and onto BUP-NX are provided in the study MOP. Following induction, XR-NTX is administered by injection approximately every 4 weeks; and BUP-NX is quickly titrated upwards to maintenance doses. Induction should occur as soon as practicable following randomization, but may occur as late as week 22. Participants continue into Phases 3 and 4 for research visits, even if not yet inducted onto their assigned medication.

Phase 3: Active Treatment (Week 1 through Week 24): Following randomization, participants are inducted as soon as practicable and treated per their assigned active medication condition

and followed as outpatients until 24 weeks post-randomization. Assessment visits occur weekly until relapse criteria are met. Participants whose induction onto their assigned study medication is delayed will also attend weekly research visits. Medical management visits will initially occur weekly, transition to every two weeks and then to every four weeks. In order to retain participants in treatment, and consistent with good practice, we permit flexibility with dosing (see section 8.5). The window for Visit 1 is -3/+6 days to accommodate induction; however, induction may occur after Visit 1. A +/- 3-day window is permissible for subsequent weekly visits. For participants who relapse and/or become lost to follow up, a -3/+28 day window is permissible to complete the EOT visit. Participants who relapse will discontinue study medication and weekly research visits, but should be encouraged to attend the week 24 and follow up visits at weeks 28 and 36.

Phase 4: Post Treatment Follow-up (Week 25 through Week 36): Toward the end of the 24-week treatment period, participants are referred for follow-up care in the community (which could include continuation of medication, if available, indicated, and desired), and follow-up outcomes are assessed at week 28 and week 36 post-randomization. For participants receiving BUP-NX, who do not wish to continue, or for whom community resources are not available, the study provides a two-week BUP-NX taper. A -3/+28 day window is permissible for the scheduled week 28 visit and a +/- 4 week window is permissible for the scheduled week 36 visit.

## **6.2 Treatment Initiation**

To maximize generalizability, this study is designed to permit entry of participants throughout opioid detoxification and early abstinence. While XR-NTX can only be administered to individuals who have completed detoxification, the percentage of participants who are randomized early that are able to successfully initiate antagonist therapy is unknown. A risk to this study plan is that a differentially large percentage of individuals may be unable to initiate XR-NTX versus buprenorphine therapy. The study includes an adaptive strategy such that if at a single time point a statistically lower treatment initiation rate is observed in “early” entry cases, then the study will be revised to:

- (a) Exclude further early entry cases and analyze them separately; and
- (b) Expand the total accrual target to maintain the initial design power for the late entry cases.

This assessment occurred after the entry of 100 cases randomized early in the detoxification process (e.g., prior to 3 opioid-free days).

## **6.3 Duration of Study and Visit Schedule**

Each participant is engaged in the overall study for approximately 9 months as follows:

- Up to 15 days: Consent, screening and randomization.
- 24 weeks: Weekly research visits for 24 weeks; and active treatment, once inducted, up to week 24 post-randomization.
- 12 weeks: Follow-up, with visits at weeks 28 and 36 post-randomization.

## 7.0 STUDY POPULATION

Study participants are treatment-seeking heroin- and/or prescription opioid-dependent volunteers, without chronic pain requiring opioid therapy, who are willing to accept “agonist-based” or “antagonist-based” therapy. Randomization is stratified by (1) treatment site, and (2) baseline opioid use (high level use [ $\geq 6$  bags {or equivalent} IV heroin/day] vs. all others [i.e.,  $< 6$  bags {or equivalent} IV heroin/day and other routes of administration or other opioids]).

### 7.1 Inclusion Criteria

1. Male or female;
2. 18 years of age and older;
3. Meet DSM-5 criteria for opioid-use disorder (heroin and/or prescription opioids);
4. Have used opioids other than as specifically prescribed within thirty days prior to consent;
5. Seeking treatment for opioid dependence and willing to accept “agonist-based” or “antagonist-based” therapy;
6. In good-enough general health, as determined by the study physician on the basis of medical history, review of systems, physical exam and laboratory assessments, to permit treatment with XR-NTX or BUP-NX;
7. Able to provide written informed consent;
8. Able to speak English sufficiently to understand the study procedures and provide written informed consent to participate in the study;
9. If female of childbearing potential, be willing to practice an effective method of birth control for the duration of participation in the study.

### 7.2 Exclusion Criteria

1. Serious medical, psychiatric or substance use disorder that, in the opinion of the study physician, would make study participation hazardous to the participant or compromise study findings or would prevent the participant from completing the study. Examples include:
  - (a) Disabling or terminal medical illness (e.g., uncompensated heart failure, cirrhosis or end-stage liver disease) as assessed by medical history, review of systems, physical exam and/or laboratory assessments;
  - (b) Severe, untreated or inadequately treated mental disorder (e.g., active psychosis, uncontrolled manic-depressive illness) as assessed by history and/or clinical interview;
  - (c) Current severe alcohol, benzodiazepine, or other depressant or sedative hypnotic use likely to require a complicated medical detoxification (routine alcohol and sedative detoxifications may be included);
2. LFTs (ALT, AST) greater than 5 times upper limit of normal;
3. Suicidal or homicidal ideation that requires immediate attention;
4. Known allergy or sensitivity to buprenorphine, naloxone, naltrexone, poly(lactide-co-glycolide), carboxymethylcellulose, or other components of the Vivitrol<sup>®</sup> diluent;
5. Maintenance on methadone at doses of 30mg or greater at the time of signing consent;
6. Presence of pain of sufficient severity as to require ongoing pain management with opioids;
7. Pending legal action or other reasons that might prevent an individual from completing the study;
8. If female, currently pregnant or breastfeeding, or planning on conception;

9. Body habitus that, in the judgment of the study physician, precludes safe intramuscular injection of XR-NTX (e.g., BMI>40, excess fat tissue over the buttocks, emaciation).

### **7.2.1 Special Populations to Consider**

This study is likely to enroll persons involved in the criminal justice system, many of whom are expected to be in treatment at the CTPs conducting this study. The study will not recruit persons incarcerated/detained in a correctional facility, but will not exclude parolees, probationers, or persons in sentencing diversion or drug court programs who are enrolled at participating CTPs. Some of these subjects may be classified as prisoners per 45 CFR 46 Subpart C.

### **7.3 CTP Sites**

This multi-site trial involves 8 CTPs that: (a) provide or partner with opioid detoxification services (inpatient/residential) which have the capacity to maintain participants opioid-free, (b) have the capacity to initiate participants onto XR-NTX or BUP-NX while they are still in an inpatient/residential setting, (c) have the capacity to maintain participants on XR-NTX or BUP-NX for the duration of 24-week trial, (d) have a sufficient flow of patients completing detoxification and who do not routinely receive long-term medication-assisted therapy as to provide a sufficient population of potential participants to achieve study enrollment goals, and (e) can provide a minimum level of outpatient care (at least one group and/or individual counseling session per week) for 24 weeks.

## **8.0 STUDY PROCEDURES**

Refer to Figure 1 (Study Schema).

### **8.1 Recruitment and Screening (Phase 1)**

Recruitment efforts will vary per site, and may broadly include CTP staff education and distribution of study materials, community or participant-level outreach and advertisements, and the encouragement of word-of-mouth referrals among CTP patient populations. During (or prior to) the first several days of an index admission, clinical and/or research staff will provide information about the study to interested, potential participants.

#### **8.1.1 Informed Consent (Phase 1)**

At any point candidates may begin the informed consent and screening procedures. The timing of consent and screening procedures is flexible, and allows CTPs to customize recruitment, screening, and randomization procedures to accommodate local conditions. Obtaining consent and baseline data early in the admission will allow a full accounting of persons interested in study enrollment but then not choosing to or not able to enroll (screen fails), while enrollment towards the end or just after detoxification will allow participants initially exposed to enrollment to reconsider and join the trial several days later. Candidates for the study are given a current local IRB-approved copy of the Informed Consent Form to read. Appropriately qualified and trained study personnel explain all aspects of the study in lay language and answer all of the study candidate's questions. Candidates who remain interested after receiving an explanation of the study are given a short informed consent quiz to test his/her understanding of the project, the purpose and procedures involved, and the voluntary nature of his/her participation. Those who cannot successfully answer quiz items have the study re-explained by research staff with a focus on aspects they did not understand. Those who demonstrate understanding of the study and voluntarily agree to participate are asked to sign the Informed Consent Form. Participants will not be administered any assessments or study procedures prior to signing informed consent. Participants are also asked to sign a release of medical records request to permit study staff to access CTP records relating to the index admission, primarily for the purpose of accessing clinical laboratory information (e.g., liver function tests) to eliminate repeat testing and speed randomization.

#### **8.1.2 Detoxification**

Guidelines for protocol-guided opioid detoxification (to be initiated after informed consent and depending on when in the detoxification process consent is obtained) are provided in the study MOP. Data on the detoxification, including number of days on the unit and medications received, are collected.

#### **8.1.3 Screening and Baseline Assessments (Phase 1)**

Screening and baseline assessments are detailed in Section 11 and capture participant demographic, medical, psychiatric, drug use, and treatment history, quality of life and current health status, in addition to blood and urine testing. These assessments confirm eligibility/ineligibility. Screening may take place at any time during Phase 1. LFTs performed within 4 weeks prior to randomization (i.e., drawn as part of usual care) are acceptable. If LFT results are available at screening, and participants meet all eligibility criteria, randomization may proceed. Otherwise, final eligibility is determined upon confirmation of LFTs.

## 8.2 Randomization (Phase 1, Day 0)

Randomization follows final confirmation of eligibility.

While the timing of randomization can be variable, it is expected that each randomized participant will initiate his or her assigned treatment. Success in initiating assigned treatment is tracked.

## 8.3 Stratified Randomization

A restricted randomization plan is used with centralized, automated, randomized block assignments. Randomization is stratified by two factors, site and pre-detoxification level of opioid use. While there are important and otherwise uncharacterized differences between sites – including state and local treatment service environments, opioid misuse epidemiology, and patient-level customs regarding treatment, medications, and clinical trial participation – the level of heroin and other opioid use will likely be an important independent predictor of treatment retention and rates of negative urines as has been demonstrated in recent analysis of naltrexone opioid trials.<sup>60-62</sup> The level of opioid use at treatment entry is a binary classification, operationally defined as 6 or more bags (or equivalent) IV heroin per day ( $\geq 6$  bags/day) over the 7 days prior to entry into the treatment program versus less than 6 bags (or equivalent) IV heroin per day ( $< 6$  bags/day) or other routes of administration or other opioids.

Timing of the randomization is important to execution of the design and may also be an important prognostic variable. All cases are classified into one of three groups at the time of randomization, those:

- (a) randomized within 24 hours of last (licit or illicit) opioid use;
- (b) randomized between 24 and 72 hours following last (licit or illicit) opioid use;
- (c) randomized more than 72 hours following last (licit or illicit) opioid use.

Each of these groups represents different clinical scenarios commonly encountered in CTN CTPs. Group (a) represents early decision-making, at such a time as to avoid unnecessary detoxification for those choosing BUP-NX. For group (b), decision-making occurs later during detoxification, but while participants still need to surmount the detoxification hurdle to begin XR-NTX. Group (c) includes participants who can be readily inducted onto either medication.

Individuals in groups (a) and (b) comprise the early cases used in the decision rule assessment after 100 of these participants had entered.

## 8.4 Induction (Phase 2)

Following randomization, participants are inducted onto their assigned pharmacotherapy. Guidelines for detoxification and induction onto XR-NTX or BUP-NX are provided in the study MOP.

XR-NTX assignment: participants randomized to XR-NTX must complete/have completed a recent opioid detoxification, be  $\geq 3$  days removed from the last dose of opioid agonist (heroin, prescription opioids, methadone or buprenorphine), have a urine toxicology negative for the extended opioid spectrum, including methadone and buprenorphine, and have a negative naloxone challenge.

BUP-NX assignment: a) participants randomized during a buprenorphine-based detoxification will continue on buprenorphine, now as a daily maintenance dose. BUP-NX will be titrated over 1-3 days to a maintenance dose range of 8-24mg/day. Lower doses and doses up to 32mg/day may be prescribed with the approval of the site PI and Study Physician; b) participants randomized during a methadone-based detoxification will discontinue methadone, and be



inducted onto BUP-NX no less than 24 hours following the last methadone dose, after withdrawal symptoms have clearly emerged; c) participants randomized during a non-opioid-based detoxification or after completing a buprenorphine- or methadone-based detoxification may be inducted onto BUP-NX immediately or after a sufficient delay since last methadone dose.

## 8.5 Study Treatments (Phase 3)

**Table 1: Treatment Visit Schedule**

| Study Week                            | -1 | 0 | 1  | 2  | 3                                                                                  | 4 | 5 | 6 | 7 | 8 | 9 | 10 | 11 | 12 | 13 | 14 | 15 | 16 | 17 | 18 | 19 | 20 | 21 | 22 | 23 | 24             |
|---------------------------------------|----|---|----|----|------------------------------------------------------------------------------------|---|---|---|---|---|---|----|----|----|----|----|----|----|----|----|----|----|----|----|----|----------------|
| Medical Management Visits (both arms) |    | x | x  | x  | x                                                                                  | x |   | x |   | x |   | x  |    | x  |    | x  |    | x  |    |    |    | x  |    |    |    | x              |
| XR-NTX Administration                 |    |   | x* | x* | Approximately every 4 weeks, with final injection occurring no later than week 22. |   |   |   |   |   |   |    |    |    |    |    |    |    |    |    |    |    |    |    |    |                |
| BUP-NX Dispensing                     |    | x | x  | x  | x                                                                                  | x |   | x |   | x |   | x  |    | x  |    | x  |    | x  |    |    |    | x  |    |    |    | x <sup>-</sup> |

x\* = the initial XR-NTX dose will depend on the length of time needed to complete detoxification and begin XR-NTX treatment; x<sup>-</sup> = for BUP-NX taper where indicated

### A. Medical Management: Both Arms

Both groups receive Medical Management (MM) clinical support from the same study clinicians (e.g., MD, DO, PA, NP, RN; working within the scope of their local licensure, clinical privileges and/or scope of practice) in unblinded fashion. MM is adapted from several recent studies of NTX, XR-NTX and BUP-NX, including the NIAAA COMBINE study<sup>63</sup>, Krupitsky et al.<sup>8</sup>, and CTN-0030 (POATS).<sup>57</sup> Briefly, MM sessions focus on establishing and maintaining patient-clinician rapport and partnership, education surrounding opioid addiction and treatment, establishing and maintaining a plan for XR-NTX or BUP-NX medication adherence, advice and encouragement to maintain abstinence, monitoring medication side effects and dose adjustments, and support for ancillary treatment, including weekly psychosocial counseling, 12-step involvement, and further community-based treatment. MM also provides guidelines for assessment and management of relapse in both arms. In contrast to studies specifically analyzing the effect of a trial's psychosocial interventions (i.e., the COMBINE trial or CTN-0030, POATS), and in keeping with a pragmatic, community-based comparative effectiveness trial, MM is broadly guided by provider training prior to study start and regular MM provider calls, a common progress note and the MM MOP, but is not subject to rigorous quality assurance procedures (i.e., audiotaping, manualization and QA audits). The study clinician assesses concomitant medications at each medical management visit. As this is not an IND study, and both medications are FDA approved for opioid dependence, the study data capture system does not include a concomitant medication case report form. MM visit schedules are the same for both arms, initially weekly (weeks 0-4), then every two weeks (weeks 4-16), and finally every four weeks (weeks 16, 20, 24). XR-NTX is injected at the MM visit approximately every 4 weeks with the final injection occurring no later than week 22. BUP-NX is dispensed at each MM visit through week 20. For all participants a final MM visit takes place on week 24 although no medication is dispensed (except for BUP-NX taper where this is indicated).

### B. Psychosocial Counseling: Both Arms

Psychosocial counseling consists of outpatient counseling provided at the CTP. Selected sites agree to provide at least a minimum level of outpatient care that consists of at least one group and/or individual counseling session per week for up to 24 weeks. Data is collected from the clinic record or from the participant on counseling sessions attended. Participation in counseling sessions is voluntary. Failure to attend counseling sessions will not be considered to be a reason to be excluded from the trial.

### **8.5.1 XR-NTX Group**

Prior to the naloxone challenge, participants randomized to XR-NTX must complete/have completed a recent opioid detoxification, be  $\geq 3$  days removed from the last dose of opioid agonist (heroin, prescription opioids, methadone or buprenorphine) and have a urine toxicology negative for all opioids, including buprenorphine. If initial UDS is positive, UDS is repeated daily until negative. Only then will the naloxone challenge take place.

#### **8.5.1.1 XR-NTX Injections**

Following a negative naloxone challenge (see MOP), XR-NTX monthly injections begin. XR-NTX (4cc, ~380mg of naltrexone base) is administered approximately every four weeks (with the final injection occurring no later than week 22), in the form of Vivitrol<sup>®</sup> which is obtained by NIDA or the NIDA contractor for distribution to the sites. XR-NTX injections may take place <4 weeks apart if there is clinical concern about non-adherence (participant is inconsistent in attending scheduled visits) or if clinical observation is that opioid craving and/or use re-emerge during the 4<sup>th</sup> week after the last injection; however, time between injections must always be at least 21 days. XR-NTX is administered by intramuscular injection to the buttocks (alternating sides) according to the injection preparation and administration procedures specified in the Vivitrol<sup>®</sup> product package insert (see Appendix C). These procedures are designed to minimize the risk of injection site reactions.

#### **8.5.1.2 Ancillary Medications**

Participants who experience withdrawal symptoms, sleeplessness, and/or depressive symptoms may be treated with ancillary medications (see guidelines in the study MOP). Depression is common in opioid-dependent patients and may adversely affect prognosis of naltrexone treatment.<sup>60</sup> Participants who show depressive symptoms may be treated with antidepressants and/or referred for psychiatric evaluation and treatment. In general, psychiatric or medical problems emerging during the study treatment period are handled by the CTP according to their usual practices for treatment and referral.

#### **8.5.1.3 Handling of Missed XR-NTX Doses, Lapses, and Relapses**

Use of illicit opioids presents different concerns in the management of patients receiving XR-NTX maintenance, compared to those receiving BUP-NX. Because of the long duration of action of XR-NTX (full blockade out to 5 weeks after the last injection<sup>17</sup>), a grace period of 7-21 days can be expected during which the injection can be rescheduled, provided the participant has not relapsed and become re-dependent. If the participant misses a scheduled injection and does not otherwise meet the primary outcome of relapse, XR-NTX may then be continued following a negative naloxone challenge (if clinically indicated) up to 21 days after a missed dose (49 days post prior injection; see MOP).

### **8.5.2 BUP-NX Group**

In keeping with the flexible randomization strategy, BUP-NX treatment is initiated as soon as practicable following consent, determination of eligibility, and randomization. Guidelines for induction at varying times from early in detoxification through early abstinence are provided in the study MOP. See also Section 8.5.2.2, titled "BUP-NX Induction".

### **8.5.2.1 BUP-NX Medication**

BUP-NX is provided as Suboxone® sublingual film, 4mg/1mg of buprenorphine/naloxone, or 8mg/2mg buprenorphine/naloxone to allow individualized medication plans. Medication is provided by NIDA or the NIDA contractor for distribution to the sites.

### **8.5.2.2 BUP-NX Induction**

a) Participants randomized during a buprenorphine-based detoxification simply continue on buprenorphine (as BUP-NX). Doses may be escalated rapidly, and titrated to a maintenance dose of 8-24mg/day over 1-3 days. Lower doses and doses up to 32mg per day may be prescribed with the approval of the site PI and Study Physician. See guidelines in the study MOP.

b) Participants randomized during a methadone-based detoxification discontinue methadone, and are inducted onto BUP-NX no less than 24hours following the last methadone dose. See guidelines in the study MOP.

c) Participants randomized during a non-opioid-based detoxification or after completing a buprenorphine- or methadone-based detoxification, who are thus “drug-free”, are given an initial 4mg/1mg sublingual dose, followed by one hour of observation, and thereafter titrated up to a maximum dose of 16mg on day 1, and a maintenance dose of 8-24mg/day over days 2-7. See guidelines in the study MOP.

### **8.5.2.3 BUP-NX Maintenance**

Maintenance doses of BUP-NX from 8mg-24mg are typical in community treatment. Lower dose and doses up to 32mg per day may be prescribed with the approval of the site PI and Study Physician. For all BUP-NX participants, from induction through week 24, daily doses may be titrated to minimize BUP-NX related AEs, minimize cravings, and in response to any intermittent illicit opioid use/lapse.

## **8.5.3 Dispensing of XR-NTX and BUP-NX**

Study medications (XR-NTX and BUP-NX) are provided by the study at no cost to the participant. XR-NTX is administered in-clinic at induction and approximately every four weeks with the final injection occurring no later than week 22. BUP-NX is dispensed to participants at induction and at treatment weeks 1, 2, 3, 4, 6, 8, 10, 12, 14, 16, and 20. Medication may be dispensed more frequently at the discretion of the study clinician. In addition, for participants receiving BUP-NX who are discontinued, who do not wish to continue, or for whom community resources to continue are not available, the study may dispense sufficient BUP-NX for up to a two-week taper beginning at any time during treatment or beginning at the week 24 visit. BUP-NX dose adjustments or emergency medication replacement between visits are allowed and will necessitate as-needed treatment and medication-dispensing visits. The clinical team may extend the window for medication administration or dispensing by up to three weeks if (a) the participant is abstinent (both self-report and urine are negative), (b) can restart the originally assigned medication, and (c) the treatment lapse is scheduled (i.e., the participant has provided a credible reason for the lapse and remains in contact with the study team).

### **8.5.3.1 Provisions for Access to Investigational Treatment After Study**

Prior to the conclusion of the 24-week active treatment phase, the research team will make an effort to arrange for continued treatment with XR-NTX or BUP-NX as appropriate within the community context. Where this is not possible (due to insurance or availability of treatment resources, etc.), alternative treatment referrals (i.e., methadone maintenance, intensive

outpatient psychosocial aftercare) are made as appropriate. For participants receiving BUP-NX, who do not wish to continue, or for whom community resources are not available, the study provides a two-week BUP-NX taper.

## **8.6 Drug Packaging/Handling/Storage/Accountability**

### **8.6.1 Study Medication Management**

Each CTP is required to observe local, state, and federal regulations regarding receipt, custody, dispensing, and disposition of all study medications. Each CTP will maintain an adequate supply of unexpired study medications on site that is supplied by the NIDA contractor.

### **8.6.2 Drug Accountability Records and Dispensing of Study Medication**

Appropriately qualified and trained study personnel maintain accurate and current accounting of all study medication by utilizing drug accountability records which are made available for review by study monitors and other appropriate research personnel.

Accurate drug accountability records:

- Demonstrate that the study drug was dispensed according to the protocol;
- Document receipt of the study medication, date, lot #, expiration date, quantity and dosage;
- Account for unopened, un-dispensed, unused, returned, waste or broken medication;
- Dosing logs should record participant ID #, date dispensed, drug name, lot # and amount dispensed;
- Temperature logs should show a daily record of medication storage temperature.

### **8.6.3 Study Medication Storage**

Study medication should be stored in compliance with federal, state, and local laws and institutional policy. Study medication is stored in a secured location under the conditions specified by the package inserts (See Appendices C and D).

### **8.6.4 Used/Unused Medication**

Study medication returned by a participant may not be re-issued for use. Unused study medication is returned and logged into a perpetual inventory of study medication returned. Damaged, returned, expired or unused study medication is accounted for by the NIDA contract monitor and sent to the central distributor or a reverse distributor for destruction. Expired XR-NTX may be destroyed on site per local institutional policies following a complete accounting by the NIDA contract monitor.

### **8.6.5 Lost Medication**

At the discretion of the site study treatment team, very limited replacement of study medications is permitted.

### **8.6.6 Dispensing of Study Medications**

All study medications shall be prepared and dispensed by a pharmacist or licensed medical practitioner appropriately trained and authorized to dispense study medications per local regulations.

### **8.6.7 Drug Packaging**

XR-NTX is supplied in single use kits. Each kit will contain one 380 mg vial of Vivitrol<sup>®</sup> microspheres, one vial containing 4 mL (to deliver 3.4 mL) diluent for the suspension of Vivitrol<sup>®</sup>, one 5-mL prepackaged syringe, one 1-inch 20-gauge needle, two 1.5-inch 20-gauge needles and two 2-inch 20-gauge needles with needle protection devices. Lot number and medication expiration date is included on the kit labels as supplied by the manufacturer. The BUP-NX films are packaged individually for both the 4mg and 8mg films. Each package has the study drug information. The label has storage conditions as well as the manufacturer and distributor information.

### **8.7 Blinding**

This study is a pragmatic, open-label, non-blinded clinical trial. Treatment assignment and active medication assignment is known to all staff and all participants.

### **8.8 Participant compensation**

Study participants are provided with pharmacotherapy and medical management at no cost. In addition, participants are compensated with cash, or vouchers of equivalent value, to offset costs of time and travel and to provide modest incentives for attending study visits. This study does not employ contingency management targeting abstinence or specifically targeting medication adherence (in other words, compensation is earned for presenting to scheduled visits and completing assessments and medication management visits if applicable).

Participants receive \$50 for completion of screening and baseline assessments and an additional \$50 following induction onto study medication. Participants receive \$20 for each weekly visit for weeks 1 through 23. Participants receive \$50 for visit 24 and each of the 2 follow-up visits. Maximum compensation possible is \$710. If a participant is found to be incarcerated at time of follow-up, the participant is compensated the agreed upon amount as approved by local IRB and/or collaborating prison facilities.

## 9.0 OUTCOME MEASURES

### 9.1 Primary Outcome

The primary goal of the study is to estimate the difference, if one exists, between XR-NTX and BUP-NX in the distribution of the time to relapse (i.e., loss of persistent abstinence) during the 6-month trial.

The primary outcome measure is the time to the event, with the event called relapse. By definition individuals are abstinent at the time of randomization. Relapse occurs if the participant is using any non-protocol prescribed opioids regularly starting at day 21 post-randomization or thereafter. Operationally, loss of persistent abstinence is defined as either: (a) four consecutive opioid use weeks, or (b) seven consecutive days of use by self-report. A use week is defined as any week during which a participant self-reports at least one day of use during that week, provides a urine sample positive for non-protocol opioids, or fails to provide a urine sample. Self-report of opioid (heroin or prescription opioids) and other substance use is ascertained at each weekly study visit using the Timeline Follow-Back for each day leading back to the previous visit. Urine is collected at each study visit and tested for opioids. In the event that a participant reports no use, but their urine test indicates use, then the week is considered a use week. Missing urine samples are classified as positive. The time of the event occurs at the start of the qualifying clinical event period (e.g., first of the 7 consecutive use days or start of the 4 consecutive weeks of use).

### 9.2 Secondary Outcomes

**Table 2: Protocol Secondary Outcomes and Hypotheses**

| Outcomes                                                                                                                                                     | Hypotheses                                                                                                                                                                                                                                                                                                                                                                                                       |
|--------------------------------------------------------------------------------------------------------------------------------------------------------------|------------------------------------------------------------------------------------------------------------------------------------------------------------------------------------------------------------------------------------------------------------------------------------------------------------------------------------------------------------------------------------------------------------------|
| Proportion successfully inducted onto assigned study medication (binary: did or did not receive first dose of XR-NTX, or achieve maintenance dose of BUP-NX) | BUP-NX will produce higher rate of successful induction than XR-NTX<br><br>Significance/Rationale: XR-NTX induction requires completion of detoxification, whereas BUP-NX induction only requires onset of withdrawal symptoms. Thus XR-NTX may have more dropouts after randomization but prior to XR-NTX induction.                                                                                            |
| Adverse Events related to study medications                                                                                                                  | XR-NTX and BUP-NX will produce equivalent rates of SAEs, and equivalent rates of AEs, though AE pattern will differ somewhat (e.g. injection site reactions with XR-NTX)<br><br>Significance/Rationale: Careful documentation of SAEs and AEs, including overdose episodes, would be considered essential safety data, and important component of a comparative effectiveness trial.                             |
| Opioid abstinence over time while on study medication (Weekly TLFB, confirmed by urine drug screens)                                                         | XR-NTX will produce greater opioid abstinence than BUP-NX<br><br>Significance/Rationale: XR-NTX produces complete blockade of opioid effects, so that during treatment with monthly injections, opioid use can be expected to be minimal. In contrast BUP-NX may not produce complete blockade, or patients may reduce or stop doses for a few days and substitute other opioids (heroin, prescription opioids). |

| Outcomes                                                                  | Hypotheses                                                                                                                                                                                                                                                                                                                                                                                                                                                                                                                                                                                                |
|---------------------------------------------------------------------------|-----------------------------------------------------------------------------------------------------------------------------------------------------------------------------------------------------------------------------------------------------------------------------------------------------------------------------------------------------------------------------------------------------------------------------------------------------------------------------------------------------------------------------------------------------------------------------------------------------------|
| Alcohol and other drug use, over time (TLFB and UDS)                      | <p>XR-NTX will be superior to BUP-NX in producing abstinence from alcohol and other drugs</p> <p>Significance/Rationale: Clinical trials show XR-NTX is effective for treatment of alcohol dependence, and naltrexone has some evidence of efficacy for stimulant dependence.</p>                                                                                                                                                                                                                                                                                                                         |
| Cigarette smoking (FTND, Tobacco Use Questionnaire, VAS nicotine craving) | <p>XR-NTX will reduce cigarette smoking compared to BUP-NX</p> <p>Significance/Rationale: Naltrexone has been studied as a treatment for nicotine dependence, with some support from clinical trials, although inconsistent. Given high morbidity and mortality associated with nicotine dependence, a comparative advantage of one or the other of these treatments at reducing smoking would be valuable to examine.</p>                                                                                                                                                                                |
| Opioid Craving (VAS) over time                                            | <p>XR-NTX will be superior to BUP-NX in reducing opioid craving</p> <p>Significance/Rationale: Krupitsky et al. (Lancet 2011) pivotal XR-NTX trial showed, surprisingly, that XR-NTX reduced craving substantially compared to placebo.</p>                                                                                                                                                                                                                                                                                                                                                               |
| Subacute withdrawal symptoms over time (HAM-D, SOWS)                      | <p>XR-NTX will produce greater severity of subacute withdrawal symptoms than BUP-NX during the first month after randomization, but will be equivalent to BUP-NX in months 2 to 6</p> <p>Significance/Rationale: Low-grade withdrawal-like symptoms (dubbed “naltrexone flu” by the Columbia group, and consisting typically of insomnia, fatigue, and anorexia, though not drug craving) have been observed in some patients in the 1 to 4 weeks after naltrexone initiation, resolving gradually. Further characterization of this syndrome would be important for developing treatment guidelines.</p> |
| Problems related to drug abuse (ASI-Lite and EQ-5D)                       | <p>XR-NTX will be superior to BUP-NX</p> <p>Significance/Rationale: Greater opioid and non-opioid abstinence on XR-NTX will result in fewer problems associated with active drug abuse.</p>                                                                                                                                                                                                                                                                                                                                                                                                               |
| HIV risk behavior over time (RAB and other HIV risk measures)             | <p>XR-NTX and BUP-NX will be equivalent</p> <p>Significance/Rationale: The opioid-dependent population is at high risk for HIV, both from injection drug use and from unsafe sexual practices. Effective treatment for the opioid dependence may reduce HIV risk behavior. Given the high morbidity and mortality associated with HIV, a comparative advantage of one or the other of these treatments would be valuable to examine.</p>                                                                                                                                                                  |
| Cognitive function (Trails Making Test Parts A and B, Stroop)             | <p>XR-NTX and BUP-NX will be equivalent</p> <p>Significance/Rationale: Some providers and policy-makers are concerned that patients maintained on BUP-NX will have opioid-agonist-related cognitive impairment.</p>                                                                                                                                                                                                                                                                                                                                                                                       |

## **10.0 PARTICIPANT DISCONTINUATION, FOLLOW-UP**

### **10.1 Treatment Discontinuation**

Study medication is discontinued in the event of intolerable side effects, safety concerns preventing further medication treatment (i.e., pregnancy), relapse, or the end of the 24-week active treatment phase (see MOP). Participants discontinuing medication, but not yet meeting relapse criteria, prior to week 24 continue within the same study assessment schedule. Participants meeting relapse criteria discontinue medication and research visits. All participants who end treatment early (prior to week 21) are encouraged to attend a visit at week 24 and are seen in long-term follow-up (weeks 28 and 36). In all cases of treatment discontinuation, the research team makes an effort to arrange for continued community treatment, as appropriate and available, including further XR-NTX and BUP-NX, or methadone maintenance and intensive outpatient psychosocial aftercare. For participants receiving BUP-NX, who do not wish to continue, or for whom community resources are not available, the study will provide a two-week BUP-NX taper, if clinically appropriate.

### **10.2 Follow-Up (Phase 4)**

An effort will be made to assess all participants at weeks 28 and 36 post randomization. The goals for the follow-up assessments are as follows:

- A. Assess safety in initial weeks and months following discontinuation of XR-NTX or BUP-NX. This would specifically address concerns about overdose deaths after XR-NTX and the criticism leveled at the FDA for approving XR-NTX indication without such data.
- B. Determine 9-month outcome following randomization to up to six months of treatment with XR-NTX or BUP-NX, including rates of relapse after successful completion of 6 months of either XR-NTX or BUP-NX treatment. This would begin to address questions about how long it is necessary to maintain agonist or antagonist treatment and whether there are differences in long-term outcomes; it will address whether early gains are sustained across time; and it will provide descriptive data on the course of opioid use following six months of treatment.
- C. Learn about what interventions are currently available and can be accessed in the community outside of a research study. This would address questions about what is current TAU for opioid dependence.

Aggressive outreach procedures will be implemented to locate and assess participants at the 28 and 36 week follow-up points and to minimize missing data. These procedures are detailed in the study MOP.

This study includes subjects who may be classified as prisoners per 45 CFR 46 Subpart C. If a subject becomes incarcerated during the study, treatment and follow-up procedures may be continued in accordance with local IRB approvals. Procedures must be compliant with 45 CFR 46 Subpart C. Data may be collected either in person, by phone, in writing, and/or by electronic means, provided that data collection follows the procedures approved by OHRP and the local IRB. Details of the nature of the research will not be shared with staff at the jail/prison, and visits, whether in person or by phone, will only be conducted if the participant's confidentiality can be maintained and no audio-taping occurs.



## **11.0 STUDY FORMS, PROCEDURES AND ASSESSMENTS**

Study assessments are intended to capture the outcomes of interest as efficiently as possible, minimizing the time and expense of research visits. Table 3 is a schedule of procedures and assessments (note that some study procedures are described in Section 8).



## **11.1 General**

### **11.1.1 Inclusion/Exclusion**

This form lists each inclusion and exclusion criterion to document eligibility. Eligibility is assessed continually as appropriate. Only participants who continue to meet study eligibility criteria are allowed to continue with the screening process, and randomization.

### **11.1.2 Locator Form**

A locator form is used to obtain information to assist in finding participants during treatment and at follow-up. This form collects the participant's current address, email address, and phone numbers. In order to facilitate locating participants if direct contact efforts are unsuccessful, addresses and phone numbers of family/friends who may know how to reach the participant are collected, as well as information such as social security number, driver's license number and other information to aid in searches of public records. This information is collected at screening, and is updated at least every month during the active treatment phase, at the end-of-treatment visit (EOT/week 24), and at the week 28 and week 36 (or EOS) post-treatment follow-up visits. No information from this form is used in data analyses nor is this information captured in the data capture system.

### **11.1.3 Demographics Form**

The demographics form collects information about demographic characteristics of the participant, including gender, date of birth, ethnicity, race, education, employment status, and marital status. This form is completed at screening.

### **11.1.4 PhenX Tier 1**

The Substance Abuse and Addiction Collection of the PhenX Toolkit ([www.phenxtoolkit.org](http://www.phenxtoolkit.org)) includes measures that are being adopted across NIDA-funded research. The Core Tier 1 collection includes measures for demographics (age, ethnicity, gender, race, educational attainment, employment status, marital status), BMI, quality of life, and HIV risk and status; substance use measures include age of onset, past 30-day quantity and frequency, lifetime use for alcohol, tobacco and other substances. Where possible, answers to Core Tier 1 questions are populated from the answers to questions from other assessments, but some additional questions may be incorporated to accommodate this requirement. Quality of Life (QLP) and Tobacco Use History (TUH) are 2 such additions. Core Tier 1 assessments are completed at Baseline only.

Homelessness is of particular interest and concern with this population. Thus a question to determine whether the participant is currently homeless or living in a shelter is asked at baseline in conjunction with the PhenX Quality of Life assessment.

### **11.1.5 Motivations, Attitudes, and Expectations Form**

Motivation for participating in the study and attitudes and expectations regarding study medication are collected once at screening.

### **11.1.6 Treatment Satisfaction Survey**

Satisfaction with treatment is recorded on the Treatment Satisfaction Survey completed at the end-of-treatment visit (EOT/week 24).

### **11.1.7 Relapse**

Relapse criteria is reviewed at each research visit beginning with visit 4 (since relapse by definition cannot occur before Day 21) and continuing through the end-of-treatment visit (EOT/week 24). This form documents the time to event.

### **11.1.8 Continuing Treatment Forms**

At the conclusion of study treatment, participants are discharged to treatment in the community. These forms document the treatment plan identified for the participant at week 24 or at the end of treatment visit if treatment is stopped early. At the 2 follow up visits (weeks 28 and 36/EOS), participants are asked whether they are adhering to the treatment plan, have initiated other treatment or discontinued all treatment.

### **11.1.9 Study Termination Form**

This form tracks the participant's status in the study. It is completed at the week 36/EOS visit or once the week 36 follow-up visit window lapses for participants who do not complete this final follow-up. This form is used in data analyses to address variables such as treatment retention and completion.

## **11.2 Safety and Medical**

The study physician must review and approve all safety and eligibility assessments in order to confirm participant eligibility prior to randomization.

### **11.2.1 Medical and Psychiatric History**

The study clinician obtains a medical and psychiatric history from the participant covering past and present health conditions to help determine eligibility and to provide baseline information. This is collected during screening. This information may be used in data analyses.

### **11.2.2 Physical Examination**

The study clinician completes a physical examination, including blood pressure and heart rate, to ensure that there are no medical concerns regarding participation and to gather baseline information regarding the participant's physical health. During the screening physical exam, a description of the participant's body habitus is documented and the study clinician examines the planned injection sites to ensure adequacy for XR-NTX gluteal intramuscular injection of naltrexone with the supplied needle. The physical examination is performed at screening and is repeated at the end-of-medication visit (if medication is stopped early) or at the end-of-treatment visit (week 24). The physical exam, blood pressure and/or heart rate may be repeated at MM visits at the discretion of the medical clinician.

### **11.2.3 DSM-5 Criteria**

The DSM-5 criteria is applied to determine a current diagnosis for substance use disorder. This is completed at screening to determine eligibility.

### **11.2.4 Concise Health Risk Tracking-Self Report (CHRT-SR)**

The CHRT-SR<sup>64</sup> is a 16-item participant self-report assessment of suicidality and related thoughts and behaviors. The scale is designed to quickly and easily track suicidality in a manner consistent with the Columbia Classification Algorithm of Suicide Assessment (C-CASA).<sup>65</sup> The CHRT-SR is assessed at screening, induction, at subsequent MM visits and at the week 28 and

36/EOS visits. The CHRT-SR will assess high risk suicide ideation by a positive response (Agree or Strongly Agree) on any of the last three questions (thoughts of, thoughts of how and/or a specific plan to commit suicide) and prompt a clinician assessment for suicide risk before leaving the clinic.

### **11.2.5 Clinical Laboratory Tests**

Liver function tests (LFTs, consisting of AST, ALT, albumin and bilirubin) and urine pregnancy test (for females) are performed to help determine eligibility at screening. Receipt and review of laboratory test results is necessary before confirming eligibility, conducting randomization and starting study medication. Results of LFTs conducted within four weeks prior to randomization (e.g., collected as part of routine detoxification admission) are acceptable. For participants whose induction onto their assigned study medication is delayed for longer than 2 weeks after randomization, LFTs and urine pregnancy should be repeated prior to start of study medication.

At screening, blood is collected for HIV antibody, hepatitis C virus (HCV) antibody and hepatitis B surface antigen (HBsAG) and hepatitis B surface antibody (HBsAB) tests. These tests do not determine eligibility and are only conducted on samples from participants who are randomized. Results of HIV antibody, hepatitis C virus (HCV) antibody and hepatitis B surface antigen (HBsAG) and hepatitis B surface antibody (HBsAB) tests conducted within four weeks prior to randomization (e.g., collected as part of routine detoxification admission) are acceptable.

For participants whose induction onto their assigned study medication occurs within 2 weeks of Day 0, LFTs are repeated at week 4, week 12, and at the end-of-medication visit (if medication is stopped early) or at the end-of-treatment visit (week 24). For participants whose induction onto their assigned study medication occurs more than 2 weeks after day 0, LFTs are repeated approximately 4 and 12 weeks following induction (a +/- 2 week window for post-induction LFTs is permitted), and at the end-of-medication visit (if medication is stopped early) or at the end-of-treatment visit (week 24). For participants who do not get inducted but continue on study, LFTs need not to be repeated at any of the planned visits with scheduled LFTs.

A laboratory that is accredited by the College of American Pathologists (CAP) or equivalent, and participates in the Clinical Laboratory Improvement Act of 1998 (CLIA) will perform these analyses. The laboratory will provide normal values and proof of lab certifications.

### **11.2.6 Pregnancy and Birth Control Assessment**

This form documents that pregnancy tests were administered, test results, and breast feeding status. The pregnancy and birth control assessment, including on-site urine pregnancy tests, is conducted at screening and may be repeated prior to randomization and/or induction. Birth control assessment and urine pregnancy tests are repeated monthly and at the end-of-medication visit (if medication is stopped early) or at the end-of-treatment visit (week 24).

### **11.2.7 Adverse Events (AEs) and Serious Adverse Events (SAEs)**

At each medical management visit the study clinician assesses for AEs and SAEs by asking the study participant, "How have you been feeling since your last visit?" AEs and SAEs may also be spontaneously reported to study staff at any visit following consent. AEs and SAEs suggesting medical or psychiatric deterioration will be brought to the attention of a study clinician for further evaluation and management. Medical management visits will emphasize overdose risk and risk-management; any reported overdose is recorded as an AE or SAE. AE and SAE reporting is according to the reporting definitions and procedures outlined in the protocol and in accordance with applicable regulatory requirements.

For the purpose of this study, the following AEs do not require reporting in the data system but is captured in the source documentation as medically indicated:

- Grade 1 (mild) unrelated adverse events

This would typically include mild physical events such as headache, cold, etc., that were considered not reasonably associated with the use of the study drug/intervention.

Events related to the injection of the study medication are recorded on the Injection Site Abnormality (INA) form and will not be duplicate-reported on an AE form. Events related to withdrawal symptoms are captured on the SOWS and HAM-D and will not be duplicate-reported on an AE form. Withdrawal symptoms not captured by the SOWS or HAM-D should be reported as an AE. Events captured on study specific forms (INA, SOWS, HAM-D) are not recorded separately as an AE, unless they meet the SAE definition. Any of these events that meet the definition of an SAE are reported on the AE/SAE form set. Any spontaneous reporting of withdrawal symptoms by the participant are captured on AE form in the following situations: withdrawal symptoms reported at visits without scheduled specific structured questionnaires (SOWS, HAM-D); and withdrawal symptoms not listed in the specific structured questionnaires (SOWS, HAM-D) reported at any visit.

### **11.2.8 Injection Site Examination**

Appropriately qualified and trained medical personnel will examine the injection site on the next Medical Management visit following the XR-NTX administration. Participants are asked to immediately report any injection site reactions to study staff for evaluation, monitoring, and possible referral, as needed. Injection site reactions should be documented on the Injection Site Abnormality Log.

## **11.3 Compliance**

### **11.3.1 Dose Logs**

XR-NTX dosing is captured in the MM progress note and recorded in the appropriate CRF and dose log. A BUP-NX dose log documents the amount of medication dispensed for take-home dosing and reported as taken by the participant. These forms are completed at relevant clinic visits through the end of the active treatment phase.

### **11.3.2 Medical Management**

A Medical Management attendance log is completed to document attendance or non-attendance at each Medical Management session during the active treatment phase. The Medical Management discontinuation form is completed when MM visits end (at week 24 post-randomization, when the primary outcome of opioid relapse is met, or for other reasons as determined by the study clinician).

### **11.3.3 Psychosocial Participation**

At each weekly treatment visit, participants are asked to report on their participation in psychosocial TAU during the prior week.

## **11.4 Drug Use and Psychological**

### **11.4.1 Timeline Follow-Back (TLFB)**

The Timeline Follow-Back<sup>66, 67</sup> procedure is used to elicit the participant's self-reported use of substances before and during the entire study period. At screening, this form is used to assess substance use reported by the participant for the 30-day period prior to admission to detox. During detox, the TLFB is not captured in the data system until the date of discharge. The TLFB is administered at each study visit throughout the active treatment phase and through the end of the follow-up period to document the participant's self-reported use of substances for each day since the previous TLFB assessment.

### **11.4.2 Urine Drug Screen (UDS)**

Urine drug screens are collected at screening, as part of XR-NTX induction, weekly from week 1 through week 24/EOT, and at follow-up visits at weeks 28 and 36/EOS. In most cases the UDS should be completed before assessing self-reported drug use or dispensing medications. All urine specimens are collected using FDA-approved one-step temperature-controlled urine drug test cups following all of the manufacturer's recommended procedures. The UDS tests for the presence of the following drugs: opioids, oxycodone, barbiturates, benzodiazepines, cocaine, amphetamine, methamphetamine, marijuana, methadone, buprenorphine, and ecstasy (MDMA). In the event urine specimen tampering is suspected, either based on the observation or the adulterant tests, study staff should request a second urine sample and may observe the urine collection process according to clinic standard operating procedures. A further validity check is performed using a commercially available adulterant test strip.

### **11.4.3 Addiction Severity Index Lite (ASI-Lite)**

The ASI-Lite is derived from the Fifth Edition of the ASI<sup>68</sup>, a structured clinical interview that yields scores for seven areas of functioning typically impacted by addiction, including medical status, employment status, drug use, alcohol use, family status, legal status, and psychiatric status. Opioid use questions, including the main type of opioid used by the participant, whether a prescription opioid or heroin, the onset of the use, the participant's perception of the substance that is most problematic, and their present treatment goal will also be assessed at screening as part of the ASI assessment. The ASI-Lite is completed at baseline, at the end-of-treatment visit (week 24/EOT), and at the week 36/EOS follow-up visit.

### **11.4.4 Visual Analog Scales (VAS)**

Participants' cravings for opioids, alcohol, and other drugs are documented on visual analog scales (VAS) that range from 0 (no craving) to 100 (most intense craving possible). These scales are completed for opioid craving at screening and at each study visit throughout the active treatment phase, at the end-of-treatment visit (week 24/EOT), and at each follow-up. They are completed for alcohol, stimulants and tobacco craving at screening, weeks 4, 8, 12, 16, 20, 24/EOT, 28, and 36/EOS. VAS also documents responses to opioid use, in the event that participants use opioids during the study.

### **11.4.5 The Hamilton Depression Scale (17 item) (HAM-D)**

The 17-item Hamilton Depression Scale (HAM-D) is a clinician-administered instrument, useful for following both depression and suicidal ideation, and also for following typical symptoms of subacute withdrawal (e.g., low appetite, fatigue, poor sleep). For the purpose of this study, adequately trained research staff conduct the Hamilton Depression Scale (HAM-D).

The HAM-D is completed at screening, at weeks 1, 2, 3, 4, 8, 12, 16 and 20, at the end-of-treatment visit (week 24/EOT), and at each follow-up. A score of 1 or more to item 3 (suicidality) prompts a clinician assessment for suicide risk before leaving the clinic.

#### **11.4.6 The Subjective Opioid Withdrawal Scale (SOWS)**

This scale is useful for following self-reported opioid withdrawal symptoms. It is administered at baseline, induction, weekly during the first month after randomization, and at weeks 8, 12, 16, and 20, at the end of treatment (EOT/week 24), and at each follow-up. At the induction visit for the XR-NTX group the SOWS is administered three times, the first time within the hour prior to the naloxone challenge, the second time 10-30 minutes following the naloxone challenge, and the third time 1-3 hours following the XR-NTX injection. At the induction visit for the BUP-NX group, the SOWS is administered twice, the first time within the hour prior to BUP-NX dosing and the second time 1-3 hours following dosing.

#### **11.4.7 Fagerström Test for Nicotine Dependence (FTND)**

The Fagerström Test for Nicotine Dependence (FTND) is used for assessing nicotine dependence<sup>69,70</sup> and is administered at baseline.

#### **11.4.8 Risk Assessment Battery (RAB)**

The Risk Assessment Battery (RAB)<sup>71</sup> is a self-administered assessment of engagement in activities that increase the likelihood of contracting HIV. Several scores that measure drug risk, sex risk, and total risk are computed. This measure is completed at baseline, at week 12, and at the end-of-treatment visit (week 24/EOT), and at the week 36/EOS follow-up visit.

#### **11.4.9 Cognitive Function Tests**

Cognitive function is assessed using simple, brief, pen and paper tests (Trail Making Test, Parts A and B, and Stroop). These tests are completed at baseline, week 4, 8, 16, and at the end-of-treatment visit (EOT/week 24).

#### **11.4.10 Detoxification Utilization Form**

Data on detoxification, including number of days on the unit and medications received, is collected.

#### **11.4.11 EuroQol (EQ-5D)**

The EuroQol instrument is a standardized generalized (non disease-specific) system for describing and valuing health-related quality of life. The instrument consists of two components; the EuroQol classification instrument, which describes the respondent's health within 5 domains, and a visual analogue scale with which respondents rate their health. Responses to each component yield a preference weight that can be used to construct Quality-Adjusted Life Year estimates (QALYs). The EuroQol instrument is the recommended Health Quality Index for Economic Evaluations in the Substance Abuse and Addiction Collection of the PhenX Toolkit ([www.phenxtoolkit.org](http://www.phenxtoolkit.org)). The EQ-5D is completed at baseline, week 4, 8, 12, 16, 20, and 24, at the 2 follow up visits, at the EOT visit if treatment ends early and at the EOS visit if not done at week 36.

#### **11.4.12 Non-Study Medical and Other Services (NMS)**

Medical services that are not part of the treatment intervention are recorded on the NMS form. The NMS form captures services received outside the study and CTP including therapy visits,



physician visits, subsequent residential or hospital detoxification, hospital visits and emergency room visits and medication use through participant self-report. The assessment also captures health insurance status, employment, criminal activities, and contact with the criminal justice system. Validity of self-reported health care utilization has been demonstrated.<sup>72-74</sup> The NMS is completed at baseline, week 4, 8, 12, 16, 20, and 24, at the 2 follow up visits, at the EOT visit if treatment ends early and at the EOS visit if not done at week 36.

### **11.5 Genetics Protocol Measures**

Genetics protocol measures include one-time blood sample collection and completion of a Family Origin questionnaire. The blood sample should be collected at screening, but may be collected at any visit where there is a scheduled blood draw. The Family Origin questionnaire can be completed at any visit, ideally at the same time as the blood draw.

The Family Origin form is designed to be interviewer administered. It collects information about the participant and her/his biological family members' race/ethnicity, place of birth, and ancestry. If a participant does not know the information requested, the participant may answer "unknown".

## 12.0 STATISTICAL ANALYSIS

### 12.1 General Design

The primary goal of the study is to estimate the difference, if one exists, between XR-NTX and BUP-NX in the distribution of the time to relapse (i.e., loss of persistent abstinence) during the 6-month trial.

#### 12.1.1 Primary and Secondary Outcomes (Endpoints)

Primary Endpoint: The primary outcome measure is the time to the event with the event called relapse. By definition individuals are abstinent at the time of randomization. Relapse occurs if the participant is using any non-protocol prescribed opioids regularly starting at day 21 post-randomization or thereafter. Operationally, loss of persistent abstinence is defined as either: (a) four consecutive opioid use weeks, or (b) seven consecutive days of use by self-report. A use week is defined as any week during which a participant self-reports at least one day of use during that week, provides a urine sample positive for non-protocol opioids, or fails to provide a urine sample. Self-report of opioid (heroin or prescription opioids) and other substance use is ascertained at each weekly study visit using the Timeline Follow-Back for each day leading back to the previous visit. Urine is collected at each study visit and tested for opioids. In the event that a participant reports no use, but their urine test indicates use, then the week is considered a use week. Missing urine samples are classified as positive. The time of the event occurs at the start of the qualifying clinical event period (e.g., first of the 7 consecutive use days or start of the 4 consecutive weeks of use).

Secondary Endpoints: Secondary endpoints include success of treatment initiation and selected opioid and other drug use measures as discussed in section 9.2. A set of additional secondary endpoints that describe adverse experiences and clinical states are detailed in that section.

#### 12.1.2 Design

The therapeutic strategies defined above are evaluated and compared in a two-arm randomized open-label multi-center trial.

### 12.2 Rationale for Sample Size and Statistical Power

Original Projected Sample Size: 200 per treatment group. N = 400 total.

Data Analysis Modification Projected Sample Size: ~300 per treatment group. (N~600 total sufficient to enroll 350 late randomizers).

Rationale: The primary outcome is the time to relapse as defined above. Meta-analyses of randomized controlled trials of BUP-NX maintenance treatment for opioid dependence suggest that approximately 50% of patients are retained in BUP-NX treatment with good clinical outcome over 6 months.<sup>2</sup> Extended release naltrexone preparations have had few prior randomized comparisons but observations from a recent Russia-based trial evaluating the XR-NTX dose and formulation proposed for this trial had good results with 53% receiving all monthly injections and retained for 6 months. Direct randomized comparison of these approaches has not been performed.

We evaluate the anticipated variability of the primary terminal results by simulating under exponential distributional assumptions with event grouping over the first 21 days and using proportional hazards without censoring. Let one treatment have a 6-month success rate of 40% with exponential failure. We use a lower success target than indicated in the above paragraph because the use of the early randomization time point is expected to increase the percentage of

participants who are failures. There would be minimal impact on detectable alternatives if a higher 50% success rate was used. From the plot below, we observe that the 95% CI width for the hazard ratio for the 50<sup>th</sup> percentile of the simulation results under both the null and alternative hypotheses decreases by 31%, 19%, and 14% as the sample size increase by 50/arm from a base of 50/arm. CI width decreases by 11% when the sample size increases from 200/arm to 250/arm. We have selected 200/arm as subsequent precision improvements with this criteria are close to 10% per 100 sampling units.

Beyond a sample size of 150 to 200 patients per group, further increments in sample size (200 per group, 250 per group, 300 per group, etc.) yield diminishing returns in terms of only relatively small further narrowing of the 95% confidence interval. The rationale for increasing the total sample size to N ~600, in the event of a significant difference in induction success rate among early randomizers, is that given the current ratio of early to late randomizers, N ~600 total will yield approximately 250 early randomizers and 350 later randomizers. 350 late randomizers (N = 175 per treatment group) is close to the 400 (N = 200 per group) originally planned, and will yield a very similar (only slightly wider) 95% confidence interval. This will preserve the intent to achieve a relatively precise estimate of the difference in relapse rates among late randomizers.

**Simulation results for the 50th and Upper 95th percentile of the 95% Confidence Interval Widths for the Hazard Ratio, selected sample sizes with lambda=0 and lambda=0.678**

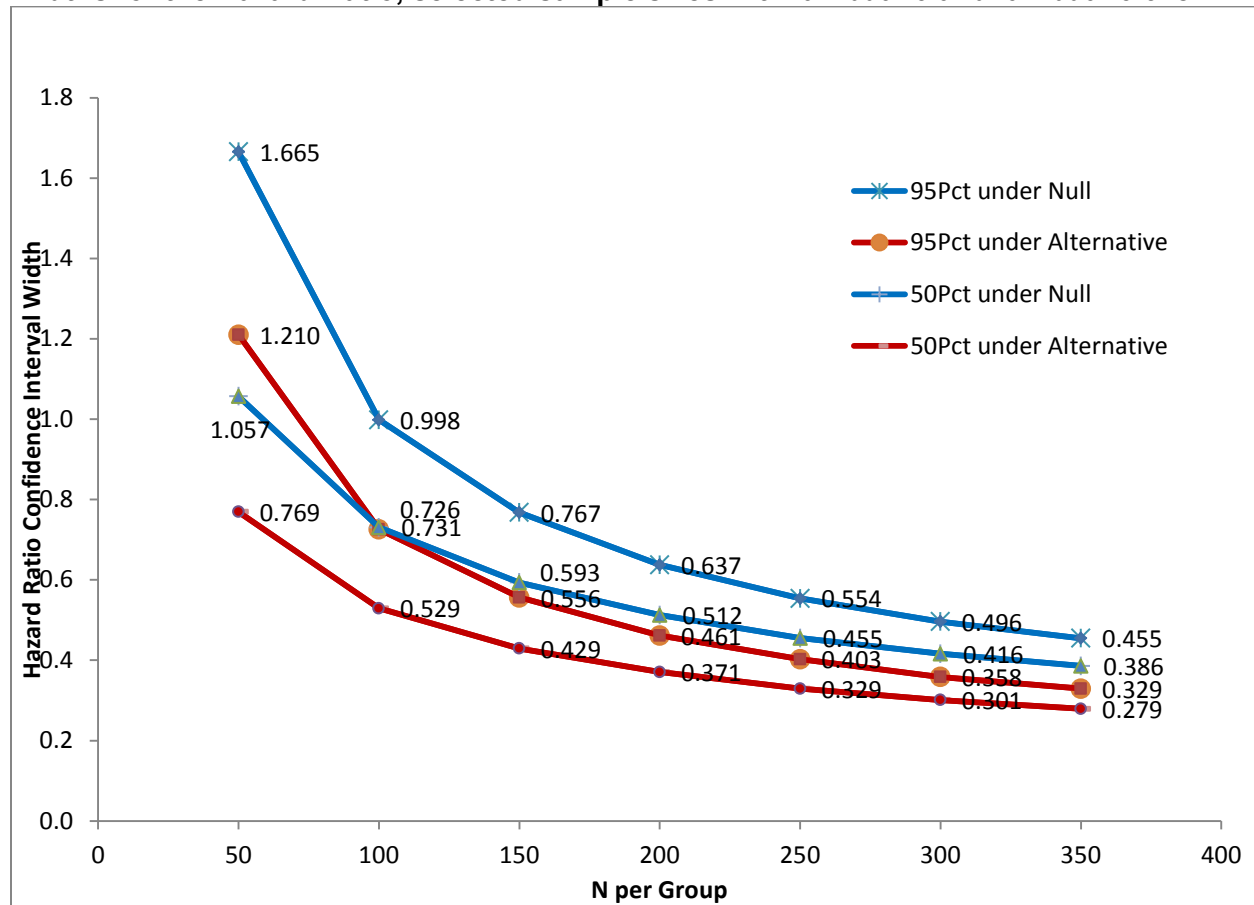

The decision theoretic properties of n=200/arm is evaluated further under a decision theoretic approach and using the logrank test. With two-sided alpha = 0.05, N = 400 total participants

provides 90% power to detect a hazard ratio of .63 for the second treatment. Table 4 provides additional characterization of power characteristics of the sample size.

**Table 4. Detectable Alternatives and Power for 2-tailed 5% level logrank test without censoring Null distribution has a 40% 6 month success rate, N1=N2=200**

| Power (%) | Hazard Ratio | 6 Month Survival Rate (%)<br>under the Alternative |
|-----------|--------------|----------------------------------------------------|
| 90.0      | .633         | 56.0                                               |
| 80.0      | .678         | 53.8                                               |

Note that inclusion of the baseline level of opioid dependence severity stratification variable in the statistical model as a covariate may increase power and narrow the confidence limits on treatment hazard ratios, should divergent success rates be present in the strata groupings.

Secondary analyses of moderators of treatment effect are important to trial sample size selection. With 200 XR-NTX cases evenly split between 2 levels of a classifying variable, we would have 79% power to detect, using a 2-tailed 5% level test of a binary endpoint, a 20 percentage point difference between the groups. Thus the selected sample size would be relatively robust in its ability to determine whether there are important differences in therapeutic success rates for major demographic or baseline clinical factors.

### 12.2.1 Projected Number of Sites, and Participants per Site

Number of Sites: We are targeting participation by 8 sites. Eligible sites will be programs that admit large numbers of actively using opioid-dependent patients per year to inpatient/residential treatment or partner with such detox facilities, where, presently, usual treatment consists of detoxification, followed by discharge to outpatient “drug free” counseling of some type, and few patients have access to medication (methadone, buprenorphine, or naltrexone) after discharge. This would support at least four randomizations per site per month, or up to 100 randomizations per site over the up to 24-month enrollment period.

Participants per Site: We expect 8 sites to randomize an average of approximately 78 participants per site.

### 12.3 Study modification for differential treatment initiation

To maximize generalizability, this study has been designed to permit entry of participants throughout the opiate detoxification process and early abstinence. At the time the study was designed it was understood that community-based practice of detoxification and medication induction would vary across sites and across patients within sites. It was further decided that the protocol would allow this variation in community based practice of detoxification-induction, consistent with the aims of an effectiveness trial to test the medications under real world conditions. It was also anticipated that induction onto BUP-NX would be easier than induction onto XR-NTX for patients who are randomized “early” while opioids are still in their system. This is because BUP-NX can be safely initiated while opioids are still in the system, as long as some signs of withdrawal begin to develop, while for XR-NTX one needs to wait until detoxification is completed and this delay is an opportunity for attrition. The concern is that a higher induction failure rate on XR-NTX, among those randomized early will contribute to differences in outcome (time-to-relapse) across the 6 month trial, with induction failure leading to relapse. If this is the case, then the interaction between early vs. late randomization and treatment assignment on the primary outcome (time to relapse) becomes germane.

Therefore, after the entry of 100 “early randomizers” (as defined in Section 8.3) we will compare the induction success rate in these early randomizers on XR-NTX vs. BUP-NX with a test of difference between proportions. The decision rule has >80% power (alpha=2.5% 1 tail) to identify differences of .25 or greater if the true initiation rate for the BUP-NX is in the expected range ( $\geq .85$ ). If the difference in induction failure rate is significant, then:

1. Increase the sample size to end enrollment at such time as 350 late randomizers have been enrolled to increase power to estimate the difference in primary outcome (time-to-relapse) in this late randomizer group. It is projected that at such time the total N will be approximately 600.
2. Amend the data analysis plan (Section 12.4 of the protocol).

## 12.4 Statistical Methods for Primary and Secondary Outcomes

### Primary Outcome Analysis:

The initial analysis will be the construction of the asymptotic 95% CI for the hazard ratio of the difference between the treatment arms in the time to event distribution for the primary outcome. The study arm success rates with confidence intervals at week 24 and the difference in success rate at that time point and associated confidence intervals will be constructed.

If the data analysis modification is implemented, the binary baseline variable (early vs. late randomization as previously defined) is included in the primary outcome analysis (outcome = time-to-relapse) as a covariate, a priori. The early vs. late randomization covariate by treatment interaction is included in the primary outcome analysis. If the covariate (early vs. late randomization) by treatment interaction is significant at  $P < .10$ , then the interaction term is retained in the final model. To characterize the interaction, the effect of treatment assignment (i.e., the difference in time-to-relapse between treatments) is estimated separately in early vs. late randomizers, and these two separate estimates become the primary findings of the study. Induction success rate is a secondary outcome measure.

Subsequent analyses will explore the treatment effect as a function of time, stratification variables and other factors that may have differential impact on treatment success. The analyses will first model the time to event primary outcome measure as a function of treatment assignment (XR-NTX vs. BUP-NX), opioid dependence severity stratum and site in a proportional hazards regression model. The constancy of the relative hazard assumption will be examined via the interaction of treatment and time, and the interaction between treatment and baseline severity will be tested.

If the stratum by treatment interaction has a  $p$ -value  $< 0.10$ , then this will be taken to indicate differences in strata-specific efficacy. We note that if this interaction is qualitative (i.e., reversal of treatment advantage in the subgroups<sup>75</sup>) this will have important consequences for future treatment and research decisions. We will test the pair-wise differences between XR-NTX and BUP-NX, separately in the low dependence vs. high dependence subgroups, and further examine the differences with an ordinal/continuous dependence covariate. Note that we are not powering the study to detect the interaction; however, given the likelihood that baseline predicts outcome, or may interact with treatment<sup>76, 77</sup>, we are acknowledging that the coefficient of the main effect of treatment in the model is not meaningful in the presence of an interaction with baseline covariates, and that a significant interaction should prompt testing of the region(s) of the baseline covariate where the probability of treatment successes differ.<sup>77, 78</sup>

Secondary analyses of the 24 week successes will include screening baseline variables to identify potential subgroups in the XR-NTX group with differential results.

#### Secondary Outcome Analyses:

Successful initiation of protocol therapy is an important binary outcome that may also be useful to subsequently explain differences in the primary outcome. Most other secondary outcome analyses will follow a similar form and strategy to that above, with different linear models as appropriate for the form of the secondary outcome variable: dichotomous secondary outcomes will use logistic regression; time-to-event variables will use survival analysis with Cox models; continuous variables or count variables (e.g., bags per day of heroin use) will use mixed effect models depending on the distribution of the outcome (e.g., normal, Poisson, negative binomial, zero-inflated). Repeated measures will have time in the model in addition to treatment and baseline variates.

### **12.5 Significance Testing**

The primary analysis focuses on estimation of the treatment difference and uses a criterion with 2.5% of the normal distribution mass in each tail. Levels of significance for additional tests and analyses are as identified.

### **12.6 Exploratory Analyses**

#### Analysis of Predictors and Moderators of Treatment Effects:

Exploratory analyses will mainly involve exploring baseline demographic and clinical variables, and candidate genetic markers, as predictors of success, or as moderators of differences in success between XR-NTX and BUP-NX. This can be analyzed by entering each predictor as a covariate in the models outlined above for primary or secondary outcome measures, and testing for the main effect of the covariate, and covariate by treatment interactions. Alternatively, demographic, clinical, and genetic factors could be examined as predictors of outcome separately within the XR-NTX and BUP-NX groups.

#### Analysis of Mediators of Treatment Effects:

Some during-treatment variables will also be of interest to explore as potential mediators of outcome. For example, opioid use during treatment has been shown to predict relapse in naltrexone, mainly use after discontinuing naltrexone (“unblocked use”), but also repeated episodes of use while on naltrexone (“blocked use”).<sup>61, 79</sup> Dysphoria, or subacute withdrawal symptoms during treatment would also be of interest as a mediator of outcome. For these analyses, the variables would be entered into the primary outcome model, or select secondary outcome models, as time-dependent covariates, examining the impact on the size of the coefficient of the treatment effect, or covariate by treatment interactions. Mediators could also be examined separately in the XR-NTX and BUP-NX groups.

### **12.7 Interim Analyses**

The study will undergo safety monitoring by the designated DSMB. Both therapies are standard therapies with regulatory approval for treatment of opiate abuse. The treatment strategies have not been directly compared before and classic interim efficacy monitoring is not planned as both are considered acceptable therapies. An adaptive strategy for addressing substantial differential treatment acceptance is described above. Continuing the study until 350 late randomizers are included in the main analysis group will assist better understanding of personalized therapeutic strategies by making precise secondary assessments and identification of subgroups that differentially benefit possible.

## 12.8 Missing Data and Dropouts

Dropout from treatment is a typical failure mode for the treatment of opioid dependence with both XR-NTX and BUP-NX. A sensitivity analysis will be performed to examine the impact on the hazard ratio and its confidence limits of alternative endpoint definitions. In particular for the primary endpoint, individuals who withdraw will be considered events if they fail to provide weekly urine specimens. An alternative to the protocol definition which introduces these as censored observations will be examined. The analyses of these events can be complex as standard assumptions (missing at random) may not be plausible.

Other outcome variables (opioid and other substance use over time, craving, mood, etc.) will have missing data due to missed visits and dropout from treatment and from study participation. The generalized linear model, or mixed effects model frameworks that will be used for analyses, works with what data are gathered, and assumes missing data are missing at random. For selected secondary outcome analyses, sensitivity analyses will be considered to examine the stability of estimated treatment effects in the face of departures from the assumption of missing at random.

Aggressive tracking procedures are put into effect to attempt to locate participants and re-engage them, and to minimize missing data. These procedures are detailed in the study MOP. The greatest likelihood of violation of the assumption of missing at random derives from dropouts, since participants assigned to XR-NTX may dropout from the study for different reasons than participants assigned to BUP-NX, creating the potential for differential attrition. Differential study attrition, where outcome differs between the dropouts from the assigned treatments is a threat to the validity of the outcome analysis. Minimizing the rate of study dropout and loss to follow-up, through aggressive tracking and follow-up, serves to reduce this threat. At a minimum the data gathered on dropouts can be used to test the assumption of missing at random, by examining whether dropouts from the different treatment assignments have similar or different outcome.

## 12.9 Demographic and Baseline Characteristics

### Demographic variables:

Gender, age, race, ethnicity, educational level, employment status, marital status.

### Baseline clinical characteristics:

Opioid dependence severity, severity of other substance use, severity of mood/anxiety symptoms, severity of opioid withdrawal symptoms, current/past co-occurring psychiatric disorders, current medical disorders, select genetic markers (e.g., candidates will include the A118G variant of the mu-opioid receptor gene, the G36T variant of the kappa opioid receptor gene, and the 3'UTR haplotype of the prodynorphine gene), history of legal problems, currently under legal supervision (parole, probation, or mandated).

Baseline demographic and clinical variables will be summarized for each arm of the study. Descriptive summaries of the distribution of continuous baseline variables will be presented with percentiles (median, 25th and 75th percentiles), and with mean and standard deviation. Categorical variables will be summarized in terms of frequencies and percentages. Since randomization is expected to produce balance at baseline between the two arms of the trial, statistical comparisons of treatment groups with respect to baseline characteristics should be more informal. The updated CONSORT statement<sup>60</sup> no longer recommends formal testing of statistical significance of differences between baseline characteristics.

### **12.10 Safety Analysis**

Adverse events (AEs), including serious adverse events (SAEs), will be summarized by body system and preferred term using MedDRA (The Medical Dictionary for Regulatory Activities). Adverse events will be presented in two ways: (1) the number and proportion of participants experiencing at least one incidence of each event will be presented overall and by treatment group; and (2) a table displaying the total number of each event will be given overall and by treatment group. Listings of serious adverse events will be given, sorted by treatment, body system, and preferred term. Detail in these listings will include severity, relationship to study drug, and action taken as available. Treatment arm differences will be monitored by the DSMB.



## **13.0 REGULATORY COMPLIANCE AND SAFETY MONITORING**

### **13.1 Statement of Compliance**

This trial will be conducted in compliance with the current version of the protocol, current Good Clinical Practice (GCP), the principles of the Declaration of Helsinki, and all other applicable regulatory requirements. Participating sites must obtain written approval of the study protocol, consent form, other supporting documents, and any advertising for participant recruitment from their local institutional review board (IRB) in order to participate in the study. Prior to study initiation, the protocol and the informed consent documents will be reviewed and approved by an appropriate Ethics Review Committee (ERC) or IRB. Any amendments to the protocol or consent materials must be approved before they are implemented. Annual progress reports and local Serious Adverse Event (SAE) reports will be submitted to each IRB, according to its usual procedures.

### **13.2 Institutional Review Board Approvals**

Prior to initiating the study, site investigators will obtain written local IRB approval to conduct the study at their respective site. Should changes to the study protocol become necessary, protocol amendments will be submitted in writing by the investigators for IRB approval prior to implementation. In addition, IRBs will approve all consent forms, recruitment materials, social media use and any materials given to the participant. Annual reports and progress reports will be submitted to the IRBs annually or at a frequency requested by each IRB. Each site investigator is responsible for maintaining in his/her research files copies of all current IRB approval notice(s), IRB-approved consent document(s), including approval for all protocol modifications pertinent to his/her performance site(s). These materials must be received by the lead investigator prior to the initiation of research activities at a given site, and must be available at any time for audit.

### **13.3 Research Advisory Panel of California (California sites only)**

Prior to initiating the study, the sponsor will obtain written approval from the Research Advisory Panel of California (RAP-C). Any planned research project to be conducted in California requiring the use of a Schedule I or Schedule II Controlled Substance as its main study drug as well as research for the treatment of controlled substance addiction or abuse utilizing any drug, scheduled or not (SAT) must be submitted to RAP-C for review and approval prior to study start-up. Study approval is based on review of the study protocol, consent form, and other pertinent study documents. Yearly reports will be provided to the RAP-C in order to obtain continuing study approval.

### **13.4 Confidentiality**

By signing the protocol signature page the investigator affirms that information furnished to the investigator by NIDA will be maintained in confidence and such information will be divulged to the IRB, Ethical Review Committee, or similar expert committee; affiliated institution; and employees only under an appropriate understanding of confidentiality with such board or committee, affiliated institution and employees. The Study lead investigator has obtained a federal Certificate of Confidentiality (CoC), protecting participants against disclosure of sensitive information (e.g., drug use), and will distribute it to all sites when received. The NIH office that issues the CoC will be advised of changes in the CoC application information. Participating CTP sites will be notified if CoC revision is necessary. Confidentiality will be maintained in

accordance with all applicable federal regulations and/or state/Commonwealth law and regulations.

Participant records will be kept confidential by the use of study codes for identifying participants on CRFs, secure separate storage of any documents that have participant identifiers, and secure computing procedures for entering and transferring electronic data.

#### **13.4.1 Health Insurance Portability Accountability Act (HIPAA)**

Study sites may be required by their institutions to obtain authorization from participants for use of protected health information. Releases of participant identifying information that are permitted by the HIPAA regulations, but which are prohibited by other applicable federal regulations and/or state/Commonwealth law and regulation, are prohibited. Sites will be responsible for communicating with their IRBs or Privacy Boards and obtaining the appropriate approvals or waivers to be in regulatory compliance.

#### **13.4.2 Investigator Assurances**

Each institution's IRB of record reviewing the study at the community treatment program (CTP) must file (or have previously filed) a Federal Wide Assurance (FWA) with the DHHS Office for Human Research Protection setting forth the commitment of the organization to establish appropriate policies and procedures for the protection of human research subjects, with documentation sent to NIDA or its designee. Research covered by these regulations cannot proceed in any manner prior to NIDA's receipt of certification that the research has been reviewed and approved by the IRB provided for in the assurance (45 CFR 46.103(b) and (f)). Prior to initiating the study, the principal investigator and sub-investigators at each study site will sign a protocol signature page, providing assurances that the study will be performed according to the standards stipulated therein.

#### **13.4.3 Financial Disclosure**

All investigators will comply with the requirements of 42 CFR Part 50, Subpart F to ensure that the design, conduct, and reporting of the research will not be biased by any conflicting financial interest. It is the responsibility of the investigator to maintain appropriate disclosure to their individual institution according to their requirements.

### **13.5 Drug Accountability**

Upon receipt, the investigator, pharmacist, or authorized designee at each site is responsible for taking inventory of the investigational agents. A record of this inventory must be kept and usage must be documented. Any unused or expired investigational agent shall be accounted for.

#### **13.5.1 DEA Registration**

All DEA requirements must be met, including registration, inspection if required, and certification, as applicable. In order to receive shipments of study drug, sites must have a DEA registration (facility research registration or a practitioner registration) that has the address where study drug will be shipped on the registration. Additionally, dispensing any controlled substance requires a DEA registration unless exempt by federal or state law or pursuant to CFR Sections 1301.22-1301.26.

#### **13.5.2 Inclusion of Women and Minorities**

Unless specified in eligibility the study is open to any gender, race or ethnicity. A diverse group of study sites will be involved so that these sites can attract a diverse study population. If

difficulty is encountered in recruiting an adequate number of women and/or minorities, the difficulties involved in recruitment will be discussed in national conference calls and/or face-to-face meetings, encouraging such strategies as linkages with medical sites and or treatment programs that serve a large number of women or minorities, advertising in newspapers or radio stations with a high female or minority readership/listening audience, etc.

### **13.5.3 IND Requirements**

Medications to be used in this study will be used in accordance with their approved labeling and therefore there is no plan to submit an IND application.

### **13.5.4 Regulatory Files**

The regulatory files should contain all required regulatory documents, study-specific documents, and all important communications. Regulatory files will be available at each participating site for regulatory document inspection for compliance prior to study initiation, throughout the study, as well as at study closure.

### **13.5.5 Records Retention and Requirements**

Research records for all study participants (e.g., case report forms, source documents, signed consent forms, and regulatory files) are to be maintained by the investigator in a secure location for a minimum of 3 years after the study is completed and closed. These records are also to be maintained in compliance with local IRB, state and federal requirements, whichever is longest. The sponsor and lead investigator must be notified in writing and acknowledgment must be received by the site prior to the destruction or relocation of research records.

### **13.5.6 Audits**

The Sponsor has an obligation to ensure that this trial is conducted according to good research practice guidelines and may perform quality assurance audits for protocol compliance. The Lead Investigator and authorized staff from the National Lead Study Team; the National Institute on Drug Abuse Clinical Trials Network (NIDA CTN, the study sponsor); NIDA's contracted agents, monitors or auditors; and other agencies such as the Department of Health and Human Services (DHHS), the Office for Human Research Protection (OHRP) and the site's Institutional Review Board may inspect research records for verification of data, compliance with federal guidelines on human participant research, and to assess participant safety.

### **13.5.7 Reporting to Sponsor**

The site principal investigator agrees to submit accurate, complete, legible and timely reports to the Sponsor, as required. These include, but are not limited to, reports of any changes that significantly affect the conduct or outcome of the trial or increase risk to study participants. Adverse Event reporting and Serious Adverse Event reporting will occur as described in Appendix A. At the completion of the trial, the national lead Investigator will provide a final report to the Sponsor.

### **13.5.8 Informed Consent**

All potential candidates for the study will be given a current local IRB-approved copy of the Informed Consent Form to read. Appropriately qualified and trained study personnel will explain all aspects of the study in lay language and answer all of the study candidate's questions. Participants who remain interested after receiving an explanation of the study will be given a informed consent quiz to test his/her understanding of the project, the purpose and procedures

involved, and the voluntary nature of his/her participation. Those who cannot successfully answer quiz items will have the study re-explained by research staff with a focus on aspects they did not understand. Anyone who cannot demonstrate appropriate understanding of the study will be ineligible to participate and will be assisted in finding other treatment resources. Those who demonstrate understanding of the study and voluntarily agree to participate will be asked to sign the informed consent form. Participants will not be administered any assessments or study procedures prior to signing informed consent.

The informed consent process is a means of providing study information to each prospective participant and allows for an informed decision about participation in the study. The informed consent form must be updated or revised whenever important new safety information is available, or whenever the protocol is amended in a way that may affect a study participant's participation in the trial. Each study site must have the study informed consent approved by their local IRB(s). The site must maintain the original signed informed consent for every participant in a locked, secure location that is in compliance with their local IRB and institutional policies and that is accessible for quality assurance review and regulatory compliance. Every study participant should be given a copy of the signed consent form to keep for reference. Individuals who refuse to participate or who withdraw from the study will be treated without prejudice.

### **13.5.9 Clinical Monitoring**

The monitoring of the study site will be conducted on a regular basis using a combination of NIDA-contracted monitors and RRTC (Regional Research and Training Center) site managers. Investigators will host periodic visits by NIDA contract monitors and local site managers. The purpose of these visits is to encourage and assess compliance with GCP requirements and to document the integrity of the trial progress.

NIDA contract monitors will monitor study compliance and study procedures to assess compliance with the protocol, GCP, and applicable regulations. NIDA contract monitors will assess accurate submission of data and that data are in agreement with source documentation and will also review regulatory/essential documents such as correspondence with the IRB. Areas of particular concern will be participant informed consent, protocol adherence, safety monitoring, IRB reviews and approvals, regulatory documents, participant records, study drug accountability, and principal investigator supervision and involvement in the trial. Reports will be prepared following the visit and forwarded to the site principal investigator, the lead investigator and NIDA.

Qualified RRTC site managers will provide site management for each site during the trial. This will take place as specified by the local protocol team, RRTC PI or lead team and will occur as often as needed to help prevent, detect, and correct problems at the study sites. RRTC staff will ensure site staff is trained and able to conduct the protocol appropriately and that study procedures are properly followed. If the RRTC staff's review of study documentation indicates that additional training of study personnel is needed, RRTC staff will undertake or arrange for that training. Details of the contract monitoring, RRTC site management, and data monitoring are found in the study Quality Assurance Monitoring plan.

### **13.5.10 Study Documentation**

Study documentation includes all case report forms, workbooks, source documents, monitoring logs and appointment schedules, sponsor-investigator correspondence, and signed protocol and amendments, Ethics Review Committee or Institutional Review Committee correspondence and approved current and previous consent forms and signed participant consent forms.

Source documents include all recordings of observations or notations of clinical activities and all reports and records necessary for the evaluation and reconstruction of the clinical research study. The original recording of an observation should be retained as the source document. If the original recording of an observation is the electronic record, that will be considered the source.

## **13.6 Safety Monitoring**

### **13.6.1 Medical Monitor**

A NIDA-assigned Medical/Safety Monitor will be responsible for overseeing safety and for evaluating all Adverse Events (AEs). He/She will review all Serious Adverse Events (SAEs) within five days of their occurrence and all other Adverse Events on a regular basis. It is the responsibility of the site principal investigator to provide this information to the medical safety monitor. It is also the site principal investigators' responsibility to inform the IRBs per local IRB guidelines.

### **13.6.2 Data and Safety Monitoring Board (DSMB)**

This study will utilize the CTN DSMB to oversee ongoing trial progress. The purpose of this board is to determine whether risks emerge during the conduct of the trial that make continuation unethical (e.g., clear and significant superiority of one condition over another). This process is intended to assure the IRBs, the sponsor, and investigators that participants are provided with an accurate and ongoing risk evaluation when participating in CTN research trials. Safety monitoring begins with the initial review of the protocol during the study development process. The DSMB will meet at least annually. Recommendations from these reviews will be distributed to the site lead investigator for submission to their IRB.

### **13.6.3 Protocol Deviations Reporting and Management**

Any departure from procedures and requirements outlined in the protocol will be classified as either a major or minor protocol deviation. The difference between a major and minor protocol deviation has to do with the seriousness of the event and the corrective action required. A minor protocol deviation is considered an action (or inaction) that by itself is not likely to affect the scientific soundness of the investigation or seriously affect the safety, rights, or welfare of a study participant. Major protocol deviations are departures that may compromise the participant safety, participant rights, inclusion/exclusion criteria or the integrity of study data and could be cause for corrective actions if not rectified or prevented from re-occurrence. Sites will be responsible for developing corrective action plans for both major and minor deviations as appropriate. Those corrective action plans may be reviewed/approved by the Lead Node and the CCC with overall approval by the site's IRB. All protocol deviations will be monitored at each site for (1) significance, (2) frequency, and (3) impact on the study objectives, to ensure that site performance does not compromise the integrity of the trial.

Sites will encourage all participants to attend visits in person, however visits by phone are allowed. In those cases, research staff should complete as many of the study procedures and assessments as possible. Missed assessments will be noted as a protocol deviation. The research team should also note that missed urine drug screens associated with phone visits will contribute towards meeting relapse criteria.

All protocol deviations will be recorded in the Electronic Data Capture (EDC) system via the Protocol Deviation CRF. The CCC, DSC and the Lead Investigator must be contacted immediately if an unqualified or ineligible participant is randomized into the study.

Additionally, each site is responsible for reviewing their local IRB's definition of a protocol deviation or violation and understanding which events need to be reported. Sites must recognize that the CTN and IRB definition of a reportable event may differ and act accordingly in following all reporting requirements for both entities.

#### **13.6.4 Adverse Events (AEs)**

The Lead Investigator (LI) may appoint a Study Clinician (e.g., MD, DO, PA, NP, or RN) for this study, who will review or provide consultation for each serious adverse event as needed. These reviews will include an assessment of the severity and causal relationship with the study drug or study procedures. The Study Clinician will also provide advice for decisions to exclude, refer, or withdraw participants as required. In addition, NIDA will assign a Medical Monitor to this protocol to independently review the safety data, and present it to the DSMB for periodic review. The medical monitor will determine which adverse events require expedited reporting to NIDA, the DSMB, pharmaceutical/distributors (Reckitt Benckiser Pharmaceuticals, Inc.) and regulatory authorities. This will include all suspected adverse reactions that are serious and unexpected. The study staff will be trained to monitor for and report adverse events and including serious adverse events.

Each of the participating CTPs has established practices for managing medical and psychiatric emergencies, and the study staff will continue to utilize these procedures. Study medical clinicians at each CTP will be responsible for monitoring participants for possible clinical deterioration or other problems, and for implementing appropriate courses of action.

Standard definitions for adverse events and serious adverse events, their identification, characterization regarding severity and relationship to therapy and processing are described in Appendix A.

For the purpose of this study, the following AE will not require reporting in the data system but will be captured in the source documentation as medically indicated:

- Grade 1 (mild) unrelated adverse events

This would typically include mild physical events such as headache, cold, etc., that were considered not reasonably associated with the use of the study drug/intervention.

Events related to the injection of the study medication will be recorded on the Injection Site Abnormality (INA) form and will not be duplicate-reported on an AE form. Events related to withdrawal symptoms will be captured on the SOWS and HAM-D and will not be duplicate-reported on an AE form. Withdrawal symptoms not captured by the SOWS or HAM-D should be reported as an AE. Events captured on study specific forms (INA, SOWS, HAM-D) will not be recorded separately as an AE, unless they meet the SAE definition. Any of these events that meet the definition of an SAE will be reported on the AE/SAE form set. Any spontaneous reporting of withdrawal symptoms by the participant will be captured on AE form in the following situations: withdrawal symptoms reported at visits without scheduled specific structured questionnaires (SOWS, HAM-D); and withdrawal symptoms not listed in the specific structured questionnaires (SOWS, HAM-D) reported at any visit.

### **13.6.5 Serious Adverse Events**

For the purpose of this study, the following events will not be reported as an SAE. Detox admissions will be recorded on study specific forms in the data system. They would be reported to local IRBs per local IRB guidelines:

- Aspects of the index detox admission will be documented on the Detox Utilization Form while other detox admissions will be documented on the NMS form
- Admission for labor and delivery
- Admission for elective or pre-planned surgery

### **13.6.6 Known Potential Toxicities of Study Drug/Intervention**

Refer to the package inserts for XR-NTX and BUP-NX in Appendices C and D.

## **14.0 DATA MANAGEMENT AND PROCEDURES**

### **14.1 Design and Development**

This protocol utilizes a centralized Data and Statistics Center (DSC). The DSC is responsible for the development of the electronic case report forms (eCRFs), development and validation of the clinical study database, ensuring data integrity, and training site and participating RRTC staff on applicable data management procedures. AdvantageEDC, a web-based distributed data entry system, has been implemented. This system has been developed to ensure that guidelines and regulations surrounding the use of computerized systems used in clinical trials are upheld. The remainder of this section provides an overview of the data management plan associated with this protocol.

### **14.2 Site Responsibilities**

The data management responsibilities of each individual CTP is specified by the DSC and outlined in the AdvantageEDC User's Guide.

### **14.3 Data Center Responsibilities**

The DSC 1) develops a data management plan and conducts data management activities in accordance with that plan, 2) provides final guided source documents and eCRFs for the collection of all data required by the study, 3) develops data dictionaries for each eCRF that comprehensively define each data element, 4) conducts ongoing data monitoring activities on study data from all participating CTPs, 5) monitors any preliminary analysis data cleaning activities as needed, and 6) rigorously monitors final study data cleaning.

### **14.4 Data Collection**

Data is collected at the study sites either on source documents, which are to be entered at the site into eCRFs, or through direct electronic data capture. The eCRFs are supplied by the DSC. eCRFs are to be completed on an ongoing basis during the study. The medical chart and the source documents are the source of verification of data. Paper CRFs and eCRFs should be completed according to the CRF instruction manual and relevant instructions in the study operations manual. The investigator is responsible for maintaining accurate, complete and up-to-date records, and for ensuring the completion of the eCRFs for each research participant.

### **14.5 Data Acquisition and Entry**

Completed forms and electronic data will be entered into the AdvantageEDC system in accordance with the AdvantageEDC User's Guide. Only authorized individuals shall have access to eCRFs.

### **14.6 Data Editing**

Completed data is to be entered into AdvantageEDC. If incomplete or inaccurate data are found, a query will be generated to the sites for a response. Sites are to resolve data inconsistencies and errors and enter all corrections and changes into AdvantageEDC.



#### **14.7 Data Lock and Transfer**

Data will be transmitted by the DSC to the NIDA central data repository as requested by NIDA. The DSC will conduct final data quality assurance checks and “lock” the study database from further modification. The final analysis dataset will be returned to NIDA, as requested, for storage and archive.

#### **14.8 Data Training**

The training plan for CTP staff includes provisions for training on assessments, eCRF completion guidelines, data management procedures, and the use of AdvantageEDC.

#### **14.9 Data QA**

To address the issue of data entry quality, the DSC will follow a standard data monitoring plan. An acceptable quality level prior to study lock or closeout will be established as a part of the data management plan. Data quality summaries will be made available during the course of the protocol.

## **15.0 PUBLICATIONS AND OTHER RIGHTS**

Per NIH policy, the results of the proposed trial are to be made available to the research community and to the public at large. The planning, preparation, and submission of publications will follow the policies of the Publications Committee of the CTN.

## 16.0 SIGNATURES

SPONSOR'S REPRESENTATIVE (CCTN DESIGNEE)

| Printed Name | Signature | Date |
|--------------|-----------|------|
|--------------|-----------|------|

ACKNOWLEDGEMENT BY INVESTIGATOR:

- I am in receipt of version 6.0 of the protocol and agree to conduct this clinical study in accordance with the design and provisions specified therein.
- I agree to follow the protocol as written except in cases where necessary to protect the safety, rights, or welfare of a participant, an alteration is required, and the sponsor and IRB have been notified prior to the action.
- I will ensure that the requirements relating to obtaining informed consent and institutional review board (IRB) review and approval in 45 CFR 46 are met.
- I agree to personally conduct or supervise this investigation at this site and to ensure that all site staff assisting in the conduct of this study are adequately and appropriately trained to implement this version of the protocol and that they are qualified to meet the responsibilities to which they have been assigned.
- I agree to comply with all the applicable federal, state, and local regulations regarding the obligations of clinical investigators as required by the Department of Health and Human Services (DHHS), the state, and the IRB.

SITE'S PRINCIPAL INVESTIGATOR

| Printed Name | Signature | Date |
|--------------|-----------|------|
|--------------|-----------|------|

Site Name \_\_\_\_\_

Node Affiliation \_\_\_\_\_

## 17.0 REFERENCES

1. Kreek MJ, Borg L, Ducat E, Ray B. Pharmacotherapy in the treatment of addiction: methadone. *J Addict Dis.* Apr 2010;29(2):200-216.
2. Mattick RP, Kimber J, Breen C, Davoli M. Buprenorphine maintenance versus placebo or methadone maintenance for opioid dependence. *Cochrane Database Syst Rev.* 2008(2):CD002207.
3. Mayet S, Farrell M, Ferri M, Amato L, Davoli M. Psychosocial treatment for opiate abuse and dependence. *Cochrane Database Syst Rev.* 2005(1):CD004330.
4. Mattick RP, Breen C, Kimber J, Davoli M. Methadone maintenance therapy versus no opioid replacement therapy for opioid dependence. *Cochrane Database Syst Rev.* 2009(3):CD002209.
5. Mark TL, Kassed CA, Vandivort-Warren R, Levit KR, Kranzler HR. Alcohol and opioid dependence medications: prescription trends, overall and by physician specialty. *Drug Alcohol Depend.* Jan 1 2009;99(1-3):345-349.
6. Minozzi S, Amato L, Vecchi S, Davoli M, Kirchmayer U, Verster A. Oral naltrexone maintenance treatment for opioid dependence. *Cochrane Database Syst Rev.* 2011(4):CD001333.
7. Comer SD, Sullivan MA, Yu E, et al. Injectable, sustained-release naltrexone for the treatment of opioid dependence: a randomized, placebo-controlled trial. *Arch Gen Psychiatry.* Feb 2006;63(2):210-218.
8. Krupitsky E, Nunes EV, Ling W, Illeperuma A, Gastfriend DR, Silverman BL. Injectable extended-release naltrexone for opioid dependence: a double-blind, placebo-controlled, multicentre randomised trial. *Lancet.* Apr 30 2011;377(9776):1506-1513.
9. Wolfe D CM, Dasgupta N, Bruce RD, Wodak A. Authors' Reply. *The Lancet.* 2011;378(666).
10. Wolfe D, Carrieri MP, Dasgupta N, Wodak A, Newman R, Bruce RD. Concerns about injectable naltrexone for opioid dependence. *Lancet.* Apr 30 2011;377(9776):1468-1470.
11. Volpicelli JR, Rhines KC, Rhines JS, Volpicelli LA, Alterman AI, O'Brien CP. Naltrexone and alcohol dependence. Role of subject compliance. *Arch Gen Psychiatry.* Aug 1997;54(8):737-742.
12. O'Brien CP. Naltrexone for alcohol dependence: compliance is a key issue. *Addiction.* Dec 2001;96(12):1857.
13. Rothenberg JL, Sullivan MA, Church SH, et al. Behavioral naltrexone therapy: an integrated treatment for opiate dependence. *J Subst Abuse Treat.* Dec 2002;23(4):351-360.
14. NIDA. Narcotic Antagonists: The Search for Long-acting Preparations. NIDA Research Monograph. 1976;R. Willette, ed. Rockville, MD.
15. Lobmaier P, Kornor H, Kunoe N, Bjorndal A. Sustained-release naltrexone for opioid dependence. *Cochrane Database Syst Rev.* 2008(2):CD006140.
16. Bigelow G, Preston K, Schmittner J, O'Brien C, Dong Q, Gastfriend D. A randomized, single-dose, opioid challenge study of extended-release naltrexone in opioid-using adults. *Neuropsychopharmacology.* 2006;31:S199.
17. Comer SD, Collins ED, Kleber HD, Nuwayser ES, Kerrigan JH, Fischman MW. Depot naltrexone: long-lasting antagonism of the effects of heroin in humans. *Psychopharmacology (Berl).* Feb 2002;159(4):351-360.

18. Chiang CN, Hawks R. Development of a buprenorphine-naloxone combination drug for the treatment of drug addiction. In: Harris LS, ed. *Problems of Drug Dependence 1993: Proceedings of the 55th Annual Scientific Meeting, The College on Problems of Drug Dependence*. Rockville, MD: US Department of Health and Human Services; 1994:p. 458.
19. Chiang C, Bridge P, Creedon K, et al. Buprenorphine-naloxone combination product for treating opioid addiction (abstract). Paper presented at: Fifty-eighth Annual Scientific Meeting of the College on Problems of Drug Dependence; June, 1996; San Juan, Puerto Rico.
20. Chiang CN, Bridge P, Hawks RL, et al. The development of buprenorphine-naloxone products for treating opiate dependence. In: Harris LS, ed. *Problems of Drug Dependence 1995: Proceedings of the 57th Annual Scientific Meeting, The College on Problems of Drug Dependence*. Vol NIDA Research Monograph Series, no. 162. Rockville, MD: US Department of Health and Human Services; 1996:p. 117.
21. Fudala PJ, Yu E, Macfadden W, Boardman C, Chiang CN. Effects of buprenorphine and naloxone in morphine-stabilized opioid addicts. *Drug Alcohol Depend*. Mar 1 1998;50(1):1-8.
22. Ciraulo DA, Hitzemann RJ, Somoza E, et al. Pharmacokinetics and pharmacodynamics of multiple sublingual buprenorphine tablets in dose-escalation trials. *J Clin Pharmacol*. Feb 2006;46(2):179-192.
23. Egan JE, Casadonte P, Gartenmann T, et al. The Physician Clinical Support System-Buprenorphine (PCSS-B): a novel project to expand/improve buprenorphine treatment. *J Gen Intern Med*. Sep 2010;25(9):936-941.
24. Casadonte PP, Kolodner GF, Horton T, McMurphy SM. Community treatment programs take up buprenorphine. *Sci Pract Perspect*. Aug 2004;2(2):24-29.
25. Raisch DW, Fudala PJ, Saxon AJ, et al. Pharmacists' and technicians' perceptions and attitudes toward dispensing buprenorphine/ naloxone to patients with opioid dependence. *J Am Pharm Assoc* (2003). Jan-Feb 2005;45(1):23-32.
26. Fudala PJ, Bridge TP, Herbert S, et al. Office-based treatment of opiate addiction with a sublingual-tablet formulation of buprenorphine and naloxone. *N Engl J Med*. Sep 4 2003;349(10):949-958.
27. Ling W, Charuvastra C, Collins JF, et al. Buprenorphine maintenance treatment of opiate dependence: a multicenter, randomized clinical trial. *Addiction*. Apr 1998;93(4):475-486.
28. Amass L, Kamien JB, Mikulich SK. Efficacy of daily and alternate-day dosing regimens with the combination buprenorphine-naloxone tablet. *Drug Alcohol Depend*. Feb 1 2000;58(1-2):143-152.
29. Fiellin DA, Rosenheck RA, Kosten TR. Office-based treatment for opioid dependence: reaching new patient populations. *Am J Psychiatry*. Aug 2001;158(8):1200-1204.
30. Ling W, Wesson DR, Charuvastra C, Klett CJ. A controlled trial comparing buprenorphine and methadone maintenance in opioid dependence. *Arch Gen Psychiatry*. May 1996;53(5):401-407.
31. Ling W, Wesson DR. Clinical efficacy of buprenorphine: comparisons to methadone and placebo. *Drug Alcohol Depend*. May 21 2003;70(2 Suppl):S49-57.
32. Woody GE, Poole SA, Subramaniam G, et al. Extended vs short-term buprenorphine-naloxone for treatment of opioid-addicted youth: a randomized trial. *JAMA*. Nov 5 2008;300(17):2003-2011.
33. Bickel WK, Stitzer ML, Bigelow GE, Liebson IA, Jasinski DR, Johnson RE. A clinical trial of buprenorphine: comparison with methadone in the detoxification of heroin addicts. *Clin Pharmacol Ther*. Jan 1988;43(1):72-78.

34. Johnson RE, Jaffe JH, Fudala PJ. A controlled trial of buprenorphine treatment for opioid dependence. *JAMA*. May 27 1992;267(20):2750-2755.
35. Strain EC, Stitzer ML, Liebson IA, Bigelow GE. Comparison of buprenorphine and methadone in the treatment of opioid dependence. *Am J Psychiatry*. Jul 1994;151(7):1025-1030.
36. Uehlinger C, Deglon J, Livoti S, Petitjean S, Waldvogel D, Ladewig D. Comparison of buprenorphine and methadone in the treatment of opioid dependence. Swiss multicentre study. *Eur Addict Res*. 1998;4 Suppl 1:13-18.
37. Strain EC, Stitzer ML, Liebson IA, Bigelow GE. Buprenorphine versus methadone in the treatment of opioid dependence: self-reports, urinalysis, and addiction severity index. *J Clin Psychopharmacol*. Feb 1996;16(1):58-67.
38. Walsh SL, Preston KL, Stitzer ML, Cone EJ, Bigelow GE. Clinical pharmacology of buprenorphine: ceiling effects at high doses. *Clin Pharmacol Ther*. May 1994;55(5):569-580.
39. Kuhlman JJ, Jr., Levine B, Johnson RE, Fudala PJ, Cone EJ. Relationship of plasma buprenorphine and norbuprenorphine to withdrawal symptoms during dose induction, maintenance and withdrawal from sublingual buprenorphine. *Addiction*. Apr 1998;93(4):549-559.
40. Amass L, Bickel WK, Higgins ST, Badger GJ. Alternate-day dosing during buprenorphine treatment of opioid dependence. *Life Sci*. 1994;54(17):1215-1228.
41. Fudala PJ, Jaffe JH, Dax EM, Johnson RE. Use of buprenorphine in the treatment of opioid addiction. II. Physiologic and behavioral effects of daily and alternate-day administration and abrupt withdrawal. *Clin Pharmacol Ther*. Apr 1990;47(4):525-534.
42. Huestis MA, Umbricht A, Preston KL, Cone EJ. Safety of buprenorphine: no clinically relevant cardio-respiratory depression at high IV doses. In: Harris LS, ed. *Problems of Drug Dependence 1998: Proceedings of the 60th Annual Meeting, The College on Problems of Drug Dependence*. Vol NIDA Research Monograph Series, no. 179. Rockville, MD: US Department of Health and Human Services; 1999:p. 62.
43. Lange WR, Fudala PJ, Dax EM, Johnson RE. Safety and side-effects of buprenorphine in the clinical management of heroin addiction. *Drug Alcohol Depend*. Aug 1990;26(1):19-28.
44. Bickel WK, Stitzer ML, Bigelow GE, Liebson IA, Jasinski DR, Johnson RE. Buprenorphine: dose-related blockade of opioid challenge effects in opioid dependent humans. *J Pharmacol Exp Ther*. Oct 1988;247(1):47-53.
45. Walsh SL, Preston KL, Bigelow GE, Stitzer ML. Acute administration of buprenorphine in humans: partial agonist and blockade effects. *J Pharmacol Exp Ther*. Jul 1995;274(1):361-372.
46. Singh RA, Mattoo SK, Malhotra A, Varma VK. Cases of buprenorphine abuse in India. *Acta Psychiatr Scand*. Jul 1992;86(1):46-48.
47. de Jong W, Tsegarelli T, Schouten E. Rapid assessment of injection drug use and HIV in the Republic of Georgia. *J Drug Issues*. 1999;29:843-860.
48. Ahmadi J, Maany I, Ahmadi M. Treatment of intravenous buprenorphine dependence: A randomized open clinical trial. *German Journal of Psychiatry*. 2003;6:23-29.
49. Jenkinson RA, Clark NC, Fry CL, Dobbin M. Buprenorphine diversion and injection in Melbourne, Australia: an emerging issue? *Addiction*. Feb 2005;100(2):197-205.
50. Comer SD, Collins ED, Fischman MW. Intravenous buprenorphine self-administration by detoxified heroin abusers. *J Pharmacol Exp Ther*. Apr 2002;301(1):266-276.
51. Alho H, Sinclair D, Vuori E, Holopainen A. Abuse liability of buprenorphine-naloxone tablets in untreated IV drug users. *Drug Alcohol Depend*. Apr 17 2007;88(1):75-78.

52. Faroqui MH, Cole M, Curran J. Buprenorphine, benzodiazepines and respiratory depression. *Anaesthesia*. Oct 1983;38(10):1002-1003.
53. Reynaud M, Petit G, Potard D, Courty P. Six deaths linked to concomitant use of buprenorphine and benzodiazepines. *Addiction*. Sep 1998;93(9):1385-1392.
54. Bridge TP, Fudala PJ, Herbert S, Leiderman DB. Safety and health policy considerations related to the use of buprenorphine/naloxone as an office-based treatment for opiate dependence. *Drug Alcohol Depend*. May 21 2003;70(2 Suppl):S79-85.
55. Iribarne C, Picart D, Dreano Y, Bail JP, Berthou F. Involvement of cytochrome P450 3A4 in N-dealkylation of buprenorphine in human liver microsomes. *Life Sci*. 1997;60(22):1953-1964.
56. Iribarne C, Berthou F, Carlhant D, et al. Inhibition of methadone and buprenorphine N-dealkylations by three HIV-1 protease inhibitors. *Drug Metab Dispos*. Mar 1998;26(3):257-260.
57. Weiss RD, Potter JS, Provost SE, et al. A multi-site, two-phase, Prescription Opioid Addiction Treatment Study (POATS): rationale, design, and methodology. *Contemp Clin Trials*. Mar 2010;31(2):189-199.
58. Ling W, Jacobs P, Hillhouse M, et al. From research to the real world: buprenorphine in the decade of the Clinical Trials Network. *J Subst Abuse Treat*. Jun 2010;38 Suppl 1:S53-60.
59. Ling W, Amass L, Shoptaw S, et al. A multi-center randomized trial of buprenorphine-naloxone versus clonidine for opioid detoxification: findings from the National Institute on Drug Abuse Clinical Trials Network. *Addiction*. Aug 2005;100(8):1090-1100.
60. Sullivan MA, Rothenberg JL, Vosburg SK, et al. Predictors of retention in naltrexone maintenance for opioid dependence: analysis of a stage I trial. *Am J Addict*. Mar-Apr 2006;15(2):150-159.
61. Carpenter KM, Jiang H, Sullivan MA, et al. Betting on change: modeling transitional probabilities to guide therapy development for opioid dependence. *Psychol Addict Behav*. Mar 2009;23(1):47-55.
62. Brooks AC, Comer SD, Sullivan MA, et al. Long-acting injectable versus oral naltrexone maintenance therapy with psychosocial intervention for heroin dependence: a quasi-experiment. *J Clin Psychiatry*. Oct 2010;71(10):1371-1378.
63. Anton RF, O'Malley SS, Ciraulo DA, et al. Combined pharmacotherapies and behavioral interventions for alcohol dependence: the COMBINE study: a randomized controlled trial. *JAMA*. May 3 2006;295(17):2003-2017.
64. Trivedi MH, Wisniewski SR, Morris DW, et al. Concise Health Risk Tracking scale: a brief self-report and clinician rating of suicidal risk. *J Clin Psychiatry*. Jun 2011;72(6):757-64.
65. Posner K, Oquendo MA, Gould M, Stanley B, Davies M. Columbia Classification Algorithm of Suicide Assessment (C-CASA): classification of suicidal events in the FDA's pediatric suicidal risk analysis of antidepressants. *Am J Psychiatry*. Jul 2007;164(7):1035-1043.
66. Sobell JL, Sobell MB. Timeline Follow-Back: A technique for assessing self-reported alcohol consumption. In: Litten R, Allen J, eds. *Measuring Alcohol Consumption: The Human Press, Inc.*; 1992.
67. Fals-Stewart W, O'Farrell TJ, Freitas TT, McFarlin SK, Rutigliano P. The timeline followback reports of psychoactive substance use by drug-abusing patients: psychometric properties. *J Consult Clin Psychol*. Feb 2000;68(1):134-144.
68. McLellan AT, Kushner H, Metzger D, et al. The Fifth Edition of the Addiction Severity Index. *J Subst Abuse Treat*. 1992;9(3):199-213.

69. Fagerstrom KO, Schneider NG. Measuring nicotine dependence: a review of the Fagerstrom Tolerance Questionnaire. *J Behav Med.* Apr 1989;12(2):159-182.
70. Heatherton TF, Kozlowski LT, Frecker RC, Fagerstrom KO. The Fagerstrom Test for Nicotine Dependence: a revision of the Fagerstrom Tolerance Questionnaire. *Br J Addict.* Sep 1991;86(9):1119-1127.
71. Navaline HA, Snider EC, Petro CJ, et al. Preparations for AIDS vaccine trials. An automated version of the Risk Assessment Battery (RAB): enhancing the assessment of risk behaviors. *AIDS Res Hum Retroviruses.* 1994;10 Suppl 2:S281-283.
72. Wallihan DB, Stump TE, Callahan CM. Accuracy of self-reported health services use and patterns of care among urban older adults. *Med Care.* Jul 1999;37(7):662-670.
73. Harlow SD, Linet MS. Agreement between questionnaire data and medical records. The evidence for accuracy of recall. *Am J Epidemiol.* Feb 1989;129(2):233-248.
74. Roberts RO, Bergstralh EJ, Schmidt L, Jacobsen SJ. Comparison of self-reported and medical record health care utilization measures. *J Clin Epidemiol.* Sep 1996;49(9):989-995.
75. Gail M, Simon R. Testing for qualitative interactions between treatment effects and patient subsets. *Biometrics.* Jun 1985;41(2):361-372.
76. Klein DF, Ross DC. Reanalysis of the National Institute of Mental Health Treatment of Depression Collaborative Research Program General Effectiveness Report. *Neuropsychopharmacology.* May 1993;8(3):241-251.
77. Nunes E, Hu M, Pavlicova M, Campbell A, Miele G, Hien D, Klein DF. Baseline matters: The importance of covariation for baseline severity in the analysis of clinical trials. *Am J Drug Alcohol Abuse.* Sep 2011;37(5):446-452.
78. Pocock SJ, Assmann SE, Enos LE, Kasten LE. Subgroup analysis, covariate adjustment and baseline comparisons in clinical trial reporting: current practice and problems. *Stat Med.* Oct 15 2002;21(19):2917-2930.
79. Sullivan MA, Garawi F, Bisaga A, et al. Management of relapse in naltrexone maintenance for heroin dependence. *Drug Alcohol Depend.* Dec 1 2007;91(2-3):289-292.
80. JAMA. CONSORT Statement. <http://jama.ama-assn.org/>.



## **18.0 APPENDICES**

APPENDIX A – Adverse Event Reporting Definitions and Procedures

APPENDIX B – Data Safety and Monitoring Plan

APPENDIX C – XR-NTX

APPENDIX D – BUP-NX

## **APPENDIX A – Adverse Event Reporting Definitions and Procedures**

Each participating site's principal investigator is responsible for study oversight, including ensuring human research subject protection by designating appropriately qualified and trained study personnel to assess, report and monitor adverse events.

### **Definition of Adverse Events and Serious Adverse Events**

An **adverse event** (AE) is any untoward medical occurrence in humans, whether or not considered study drug/intervention related which occurs during the conduct of a clinical trial. Any change from baseline in clinical status or any findings from ECGs, lab results, x-rays, physical examinations, etc., that are considered clinically significant by the study clinician are considered AEs.

**Suspected adverse reaction** is any adverse event for which there is a reasonable possibility that the study drug/intervention caused the adverse event. A reasonable possibility implies that there is evidence that the study drug/intervention caused the event.

**Adverse reaction** is any adverse event caused by the study drug/intervention.

An **adverse event, suspected adverse reaction, or adverse reaction** is considered "**serious**" (i.e., a serious adverse event, serious suspected adverse reaction or serious adverse reaction) if, in the view of either the study clinician or sponsor, it:

1. Results in death: A death occurring during the study or which comes to the attention of the study staff during the protocol-defined follow-up period, whether or not considered caused by the study drug/intervention, must be reported.
2. Is life-threatening: Life-threatening means that the study participant was, in the opinion of the medical clinician or sponsor, at immediate risk of death from the reaction as it occurred and required immediate intervention.
3. Requires inpatient hospitalization or prolongation of existing hospitalization.
4. Results in persistent or significant incapacity or substantial disruption of the ability to conduct normal life functions.
5. Is a congenital abnormality or birth defect.
6. Important medical event that may not result in one of the above outcomes, but may jeopardize the health of the study participant or require medical or surgical intervention to prevent one of the outcomes listed in the above definition of serious event.

### **Definition of Expectedness**

Any adverse event is considered "unexpected" if it is not listed in the investigator brochure or the package insert or is not listed at the specificity or severity that has been observed. If neither is available then the protocol and informed consent form are used to determine an unexpected adverse event.

## **Pregnancy**

Any pregnancies that occur while a participant is enrolled in the study will be captured on a pregnancy CRF and not separately reported as an AE or SAE. Women who become pregnant during the active treatment period will be discontinued from further medication administration, referred for medical care, and the pregnancy followed until an outcome is known.

## **Medical and Psychiatric History**

A thorough medical and psychiatric history during the screening phase should record any chronic, acute, or intermittent preexisting or current illnesses, diseases, symptoms, or laboratory signs of the participant, to avoid reporting pre-existing conditions as new AEs and to assist in the assessment of worsening in intensity or severity of these conditions that would indicate an AE. Stable chronic conditions, such as arthritis, which are present prior to clinical trial entry and do not worsen are not considered AEs.

## **Site Staff's Role in Eliciting and Reporting Adverse Events**

Appropriately qualified and trained study personnel will elicit participant reporting of AEs and SAEs at each study visit designated to collect AEs. Adverse events (medical and/or psychiatric) assessment and collection will begin when the participant signs the informed consent form and follow-up will continue through 30 days after the last study visit. Study personnel will obtain as much information as possible about the reported AE/SAE to complete the AE/SAE forms and will consult as warranted.

Standard reporting, within 7 calendar days of the site becoming aware of the event, is required for reportable AEs. Expedited reporting (within 24 hours of their occurrence and/or site staff's knowledge of the event) is required for reportable SAEs (including death and life-threatening events). Local sites are responsible for reporting SAEs to their IRB, per their IRB's guidelines.

Site staff is required to enter reportable AEs and SAEs in the AdvantageEDC system. The AE form is used to capture reportable AEs (as defined in the protocol). Additional information may need to be gathered to evaluate serious adverse events and to complete the appropriate CRFs and the summary. This process may include obtaining hospital discharge reports, medical records, autopsy records or any other type records or information necessary to provide a complete and clear picture of the serious event and events preceding and following the event. If the SAE is not resolved or stable at the time of the initial report or if new information becomes available after the initial report, follow-up information must be submitted as soon as possible.

Reportable adverse events will be followed until resolution, stabilization or study end. Any serious adverse reactions will be followed until resolution or stabilization even beyond the end of the study.

For the purpose of this study, the following AE classification will not require reporting in the data system but will be captured in the source documentation as medically indicated:

- Grade 1 (mild) unrelated adverse events

This would typically include mild physical events such as headache, cold, etc., that were considered not reasonably associated with the use of the study drug/intervention.

Events related to the injection of the study medication will be recorded on the Injection Site Abnormality (INA) form and will not be duplicate-reported on an AE form. Events related to withdrawal symptoms will be captured on the SOWS and HAM-D and will not be duplicate-reported on an AE form. Withdrawal symptoms not captured by the SOWS or HAM-D should be reported as an AE. Events captured on study specific forms (INA, SOWS, HAM-D) will not be recorded separately as an AE, unless they meet the SAE definition. Any of these events that

meet the definition of an SAE will be reported on the AE/SAE form set. Any spontaneous reporting of withdrawal symptoms by the participant will be captured on AE form in the following situations: withdrawal symptoms reported at visits without scheduled specific structured questionnaires (SOWS, HAM-D); and withdrawal symptoms not listed in the specific structured questionnaires (SOWS, HAM-D) reported at any visit.

### **Site Staff's Role in Assessing Severity and Causality of Adverse Events**

Appropriately qualified and trained study personnel will conduct an initial assessment of seriousness, severity, and causality when eliciting participant reporting of adverse events. A study clinician will be expected to review all reportable AEs for seriousness, severity, and causality on at least a weekly basis.

### **Guidelines for Assessing Severity**

The severity of an adverse event refers to the intensity of the event.

|         |          |                                                                                                                                                                                                                                                                                                  |
|---------|----------|--------------------------------------------------------------------------------------------------------------------------------------------------------------------------------------------------------------------------------------------------------------------------------------------------|
| Grade 1 | Mild     | Transient or mild discomfort (< 48 hours), no or minimal medical intervention/therapy required, hospitalization not necessary (non-prescription or single-use prescription therapy may be employed to relieve symptoms, e.g., aspirin for simple headache, acetaminophen for post-surgical pain) |
| Grade 2 | Moderate | Mild to moderate limitation in activity some assistance may be needed; no or minimal intervention/therapy required, hospitalization possible.                                                                                                                                                    |
| Grade 3 | Severe   | Marked limitation in activity, some assistance usually required; medical intervention/ therapy required hospitalization possible.                                                                                                                                                                |

### **Guidelines for Determining Causality**

The study clinician will use the following question when assessing causal relationship of an adverse event with study drug/intervention where an affirmative answer designates the event as a suspected adverse reaction:

Is there a reasonable possibility that the study drug/intervention caused the event?

### **Site Staff's Role in Monitoring Adverse Events**

Site designated quality assurance personnel will review study sites and respective study data on a regular basis and will promptly advise sites to report any previously unreported safety issues and ensure that the reportable safety-related events are being followed to resolution and reported appropriately. Staff education, re-training or appropriate corrective action plan will be implemented at the participating site when unreported or unidentified reportable AEs or serious events are discovered, to ensure future identification and timely reporting by the site.

### **Sponsor's Role in Safety Management Procedures of AEs/SAEs**

A NIDA CCTN assigned Medical Monitor is responsible for reviewing all serious adverse event reports. All reported SAEs will generate an e-mail notification to the Medical Monitor, pharmaceutical distributor (Reckitt Benckiser Pharmaceuticals) lead investigator, and designees. All SAEs will be reviewed by the Medical Monitor in AdvantageEDC and, if needed, additional information will be requested. The medical monitor will also report events to the sponsor, pharmaceutical distributor (Reckitt Benckiser Pharmaceuticals) and the Data and Safety Monitoring Board (DSMB). The DSMB will receive summary reports of all adverse events annually, at a minimum. The DSMB or the NIDA CCTN assigned Medical Monitor may also

request additional and updated information. Details regarding specific adverse events, their treatment and resolution, will be summarized by the medical monitor in writing for review by the sponsor and DSMB. Subsequent review by the Medical Monitor, DSMB, and ethics review committee or IRB, the sponsor, or relevant local regulatory authorities may also suspend further trial treatment at a site. The study sponsor and DSMB retain the authority to suspend additional enrollment and treatments for the entire study as applicable.

### **Reporting to the Data and Safety Monitoring Board**

The DSMB will receive listing of AEs and summary reports of all SAEs at a frequency requested by the DSMB, but at least annually. Furthermore, the DSMB will be informed of any SAE that is a serious unexpected suspected adverse reaction within 15 days of being reported by site.

### **Participant Withdrawal**

The study clinician must apply his/her clinical judgment to determine whether or not an adverse event is of sufficient severity to require that the participant be withdrawn from further study medication administration. The study clinician should consult with the site principal investigator, the lead investigator and/or Medical Monitor as needed. If necessary, a study clinician may suspend any trial treatments and institute the necessary medical therapy to protect a participant from any immediate danger. A participant may also voluntarily withdraw from treatment due to what he/she perceives as an intolerable adverse event or for any other reason. If voluntary withdrawal is requested, the participant will be asked to complete an end-of-medication visit to assure safety and to document end-of-medication outcomes and will be given recommendations for medical care and/or referrals to treatment, as necessary.

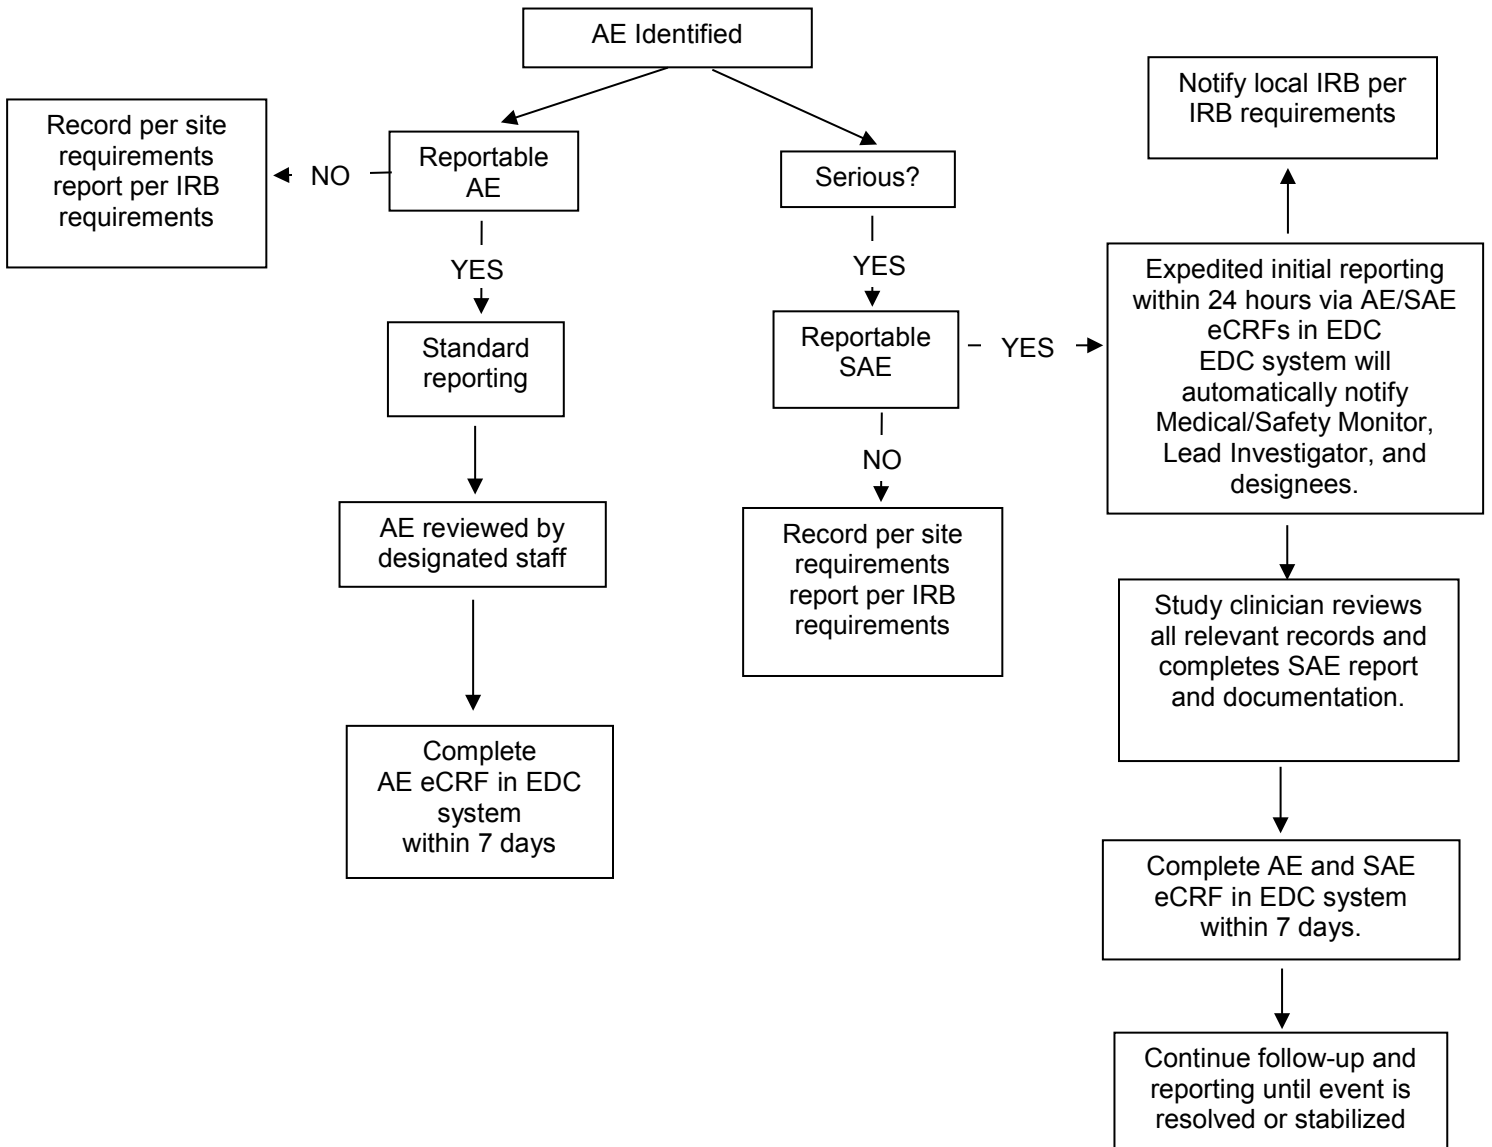

## **APPENDIX B – Data Safety and Monitoring Plan**

### **1.0 BRIEF STUDY OVERVIEW**

The primary goal of the CTN-0051 study is to estimate the difference, if one exists, between XR-NTX and BUP-NX in the distribution of the time to loss of persistent abstinence during the 6-month trial. As part of secondary outcomes, the study will evaluate and compare XR-NTX versus BUP-NX in regards to safety events, opioid dependence, relapse, and retention. The misuse of alcohol, tobacco, and other drugs of abuse will be compared, in addition to the craving for opioids and other drugs. Depression, anxiety, and sub-acute withdrawal symptoms will also be compared between the two treatments. Details for the definitions and reporting of safety events are found in the protocol (Appendix A).

### **2.0 OVERSIGHT OF CLINICAL RESPONSIBILITIES**

#### **A. Site Principal Investigator**

Each participating site's Principal Investigator (PI) is responsible for study oversight, including ensuring human research subject protection by designating appropriately qualified, trained research staff and medical clinicians to assess, report, and monitor adverse events.

Regarding safety and in accordance with FDA reporting requirements, all Adverse Events (AEs) occurring during the course of the clinical trial will be collected, documented, and reported by the investigator or sub-investigators according to the Protocol. The assessment of Adverse Events (medical and/or psychiatric) will commence at the time of participant consent and will continue through 30 days post last active treatment visit.

The occurrence of AEs and Serious Adverse Events (SAEs) will be assessed at each clinic visit during the study. Serious adverse events will be followed until resolved or considered stable, with reporting to the CCC Safety Monitor/Medical Monitor through the follow-up period.

Standard reporting, within 7 days of the site becoming aware of the event, is required for reportable AEs. Expedited reporting (within 24 hours of their occurrence and/or site's knowledge of the event) is required for reportable SAEs (including death and life-threatening events).

#### **B. Medical Monitor/Safety Monitor**

The NIDA CCTN Clinical Coordinating Center (CCC) Safety Monitor/Medical Monitor is responsible for reviewing all adverse events and serious adverse events reported. All SAEs will be reviewed at the time they are reported in the EDC. The Medical Monitor will also indicate concurrence or not with the details of the report provided by the site PI. Where further information is needed the Safety monitor/Medical monitor will discuss the event with the site. Reviews of SAEs will be conducted in AdvantageEDC data system and will be a part of the safety database. All AEs are reviewed on a weekly basis to observe trends or unusual events.

Reports will be generated and presented for Data Safety Monitoring Board (DSMB) meetings. The DSMB will receive listings of AEs and summary reports of all SAEs at a frequency requested by the DSMB, but at least annually. Furthermore, the DSMB will be informed of expedited reports of SAEs

#### **C. Data And Safety Monitoring Board (DSMB)**

The NIDA CTN DSMB affiliated with this trial will be responsible for conducting periodic reviews of accumulating safety, trial performance, and outcome data. The DSMB will make recommendations to NIDA CCTN as to whether there is sufficient support for continuation of the trial, evidence that study procedures should be changed, or evidence that the trial (or a specific

site) should be halted for reasons relating to safety of the study participants or inadequate trial performance (e.g., poor recruitment).

Following each DSMB meeting, the NIDA CCTN will communicate the outcomes of the meeting, based on DSMB recommendations, in writing to the study Lead Investigator. This communication detailing study safety information will be submitted to participating IRBs.

#### **D. Quality Assurance (QA) Monitoring**

The monitoring of the study site will be conducted on a regular basis using a combination of NIDA CCTN CCC contract monitors and the RRTC site managers. Investigators will host periodic visits for the NIDA CCTN CCC contract monitors and RRTC site managers. The purpose of these visits is to assess compliance with GCP requirements and to document the integrity of the trial progress. Areas of particular concern will be the review of Inclusion/Exclusion criteria, participant Informed Consent Forms, protocol adherence, safety monitoring, IRB reviews and approvals, regulatory documents, participant records, study drug accountability, and Principal Investigator supervision and involvement in the trial. The monitors will interact with the site staff to identify issues and re-train the site as needed to enhance research quality.

QA Site Visit Reports will be prepared by the NIDA CCC contract monitors following each site visit. These reports will be and forwarded to the site Principal Investigator, the study Lead Investigator and NIDA CCTN.

#### **E. Management Of Risks To Participants**

##### **Confidentiality**

Confidentiality of participant records will be secured by the use of study codes for identifying participants on CRFs, secure storage of any documents that have participant identifiers, and secure computing procedures for entering and transferring electronic data. No identifying information will be disclosed in reports, publications or presentations.

##### **Information Meeting Reporting Requirements**

The consent form will specifically state the types of information that are required to be reported and the fact that the information will be reported as required. These include suspected or known sexual or physical abuse of a child or elders, or threatened violence to self and/or others.

##### **Subject Protection**

The study clinician will evaluate all pertinent screening and baseline assessments prior to participant randomization to ensure that the participant is eligible and safe to enter the study. Adverse events (AEs) will be assessed and documented at each clinic visit. Concomitant medications will be assessed at each medical management visit. Individuals who experience an AE that compromises safe participation will be discontinued from further medication administration and provided referrals for other treatment or to specialized care. Study personnel will request that the participant complete an end-of medication visit to assure safety and to document end-of-medication outcomes.

##### **Pregnancy**

Pregnancy is an exclusion criterion for study participation. A positive pregnancy test post-randomization will result in the cessation of study medication. Participants who discontinue medications will be expected to continue with study visits. Pregnancy test results will be recorded on the Pregnancy and Birth Control Assessment CRF (PBC). Related outcome information will be recorded on the Pregnancy Outcome CRF (PO1, PO2, etc.). The site staff will follow the participant until an outcome of the pregnancy is known.



### **Study Specific Risks**

Vivitrol® and Suboxone® block the effects of exogenous opioids after administration. After treatment, participants are likely to have reduced tolerance to opioids. Following Vivitrol® treatment, opioid use at the end of a dosing interval or after missing a dose could result in potentially life-threatening opioid intoxication (involving respiratory compromise or arrest, circulatory collapse, etc.). Attempting to overcome the blockade effects of Vivitrol® by administering large amounts of exogenous opioids is associated with potential risk of overdose. Participants in this study will receive an information card that will notify clinicians that they are receiving Vivitrol® or Suboxone® as part of a research study.

### **3.0 DATA MANAGEMENT PROCEDURES**

This protocol will utilize a centralized Data and Statistics Center (DSC). A web-based distributed data entry model will be implemented. This electronic data capture system (AdvantageEDC) will be developed to ensure that guidelines and regulations surrounding the use of computerized systems in clinical trials are upheld.

### **4.0 DATA AND STATISTICS CENTER RESPONSIBILITIES**

The DSC will: 1) develop and apply data management procedures to ensure the collection of accurate and good-quality data, 2) provide source documents and electronic Case Report Forms (eCRFs) for the collection of all data required by the study, 3) develop data dictionaries for each eCRF that will comprehensively define each data element, 4) prepare instructions for the use of AdvantageEDC and for the completion of eCRFs, 5) conduct ongoing monitoring activities on study data collected from all participating sites, 6) perform data cleaning activities prior to any interim analyses and prior to the final study database lock.

### **5.0 DATA COLLECTION AND ENTRY**

Data will be collected at the study sites on source documents and entered by the site into eCRFs in AdvantageEDC, or will be collected via direct entry into the eCRF. In the event that AdvantageEDC is not available, the DSC will provide the sites with paper source documents and completion instructions. Data will be entered into AdvantageEDC in accordance with the instructions provided during project-specific training and guidelines established by the DSC. Data entry into the eCRFs shall be performed by authorized individuals. Selected eCRFs may also require the investigator's electronic signature.

The investigator at the site is responsible for maintaining accurate, complete and up-to-date research records. In addition, the investigator is responsible for ensuring the timely completion of eCRFs for each research participant.

### **6.0 DATA MONITORING, CLEANING AND EDITING**

eCRFs will be monitored for completeness and accuracy throughout the study. Dynamic reports listing missing values and forms are available to sites at all times in AdvantageEDC. These reports will be monitored regularly by the DSC. In addition, the DSC will identify inconsistencies within eCRFs and between eCRFs and post queries in AdvantageEDC on a scheduled basis. Sites will resolve data inconsistencies and errors by entering all corrections and changes directly into AdvantageEDC.

As described above, the CCC will conduct regular visits to sites, during which, audits comparing source documents to the data entered on the eCRF will be performed. Any discrepancies identified between the source document and the eCRF will be corrected by the site.

Trial progress and data status reports, which provide information on recruitment, availability of primary outcome, treatment exposure, attendance at long term follow-up visits, regulatory status, and data quality, will be generated daily and posted to a secure website. These reports are available to the site, the corresponding RRTC, the lead investigator, the coordinating centers, and NIDA CCTN, to monitor the sites' progress on the study.

## **7.0 DATA LOCK AND TRANSFER**

At the conclusion of data collection for the study, the DSC will perform final data cleaning activities and will "lock" the study database from further modification. The final analysis dataset will be returned to NIDA CCTN, as requested, for storage and archive.
